# Supplementary material for: Immunomodulatory effects of extracellular glyceraldehyde 3-phosphate dehydrogenase of exopolysaccharide-producing Lactiplantibacillus plantarum JCM 1149
Source: Royal Society of Chemistry journal article supplement (doi:10.1039/d2fo02927h), 2022-12-15
Supplement: d2fo02927h1.pdf [file d2fo02927h1.pdf]

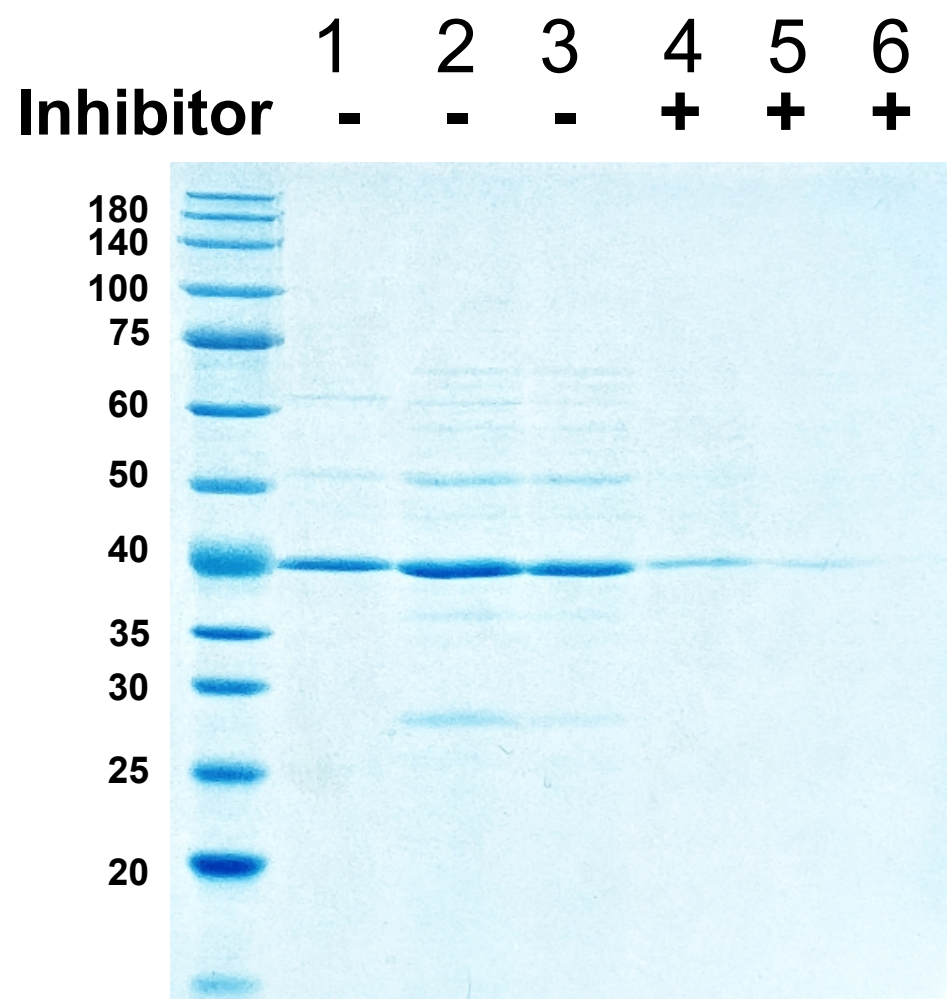

**Fig. S1.** Productions of GAPDH on cell surface with or without EPS inhibitor during cultivation of *L. plantarum* JCM 1194 (n=3/group)

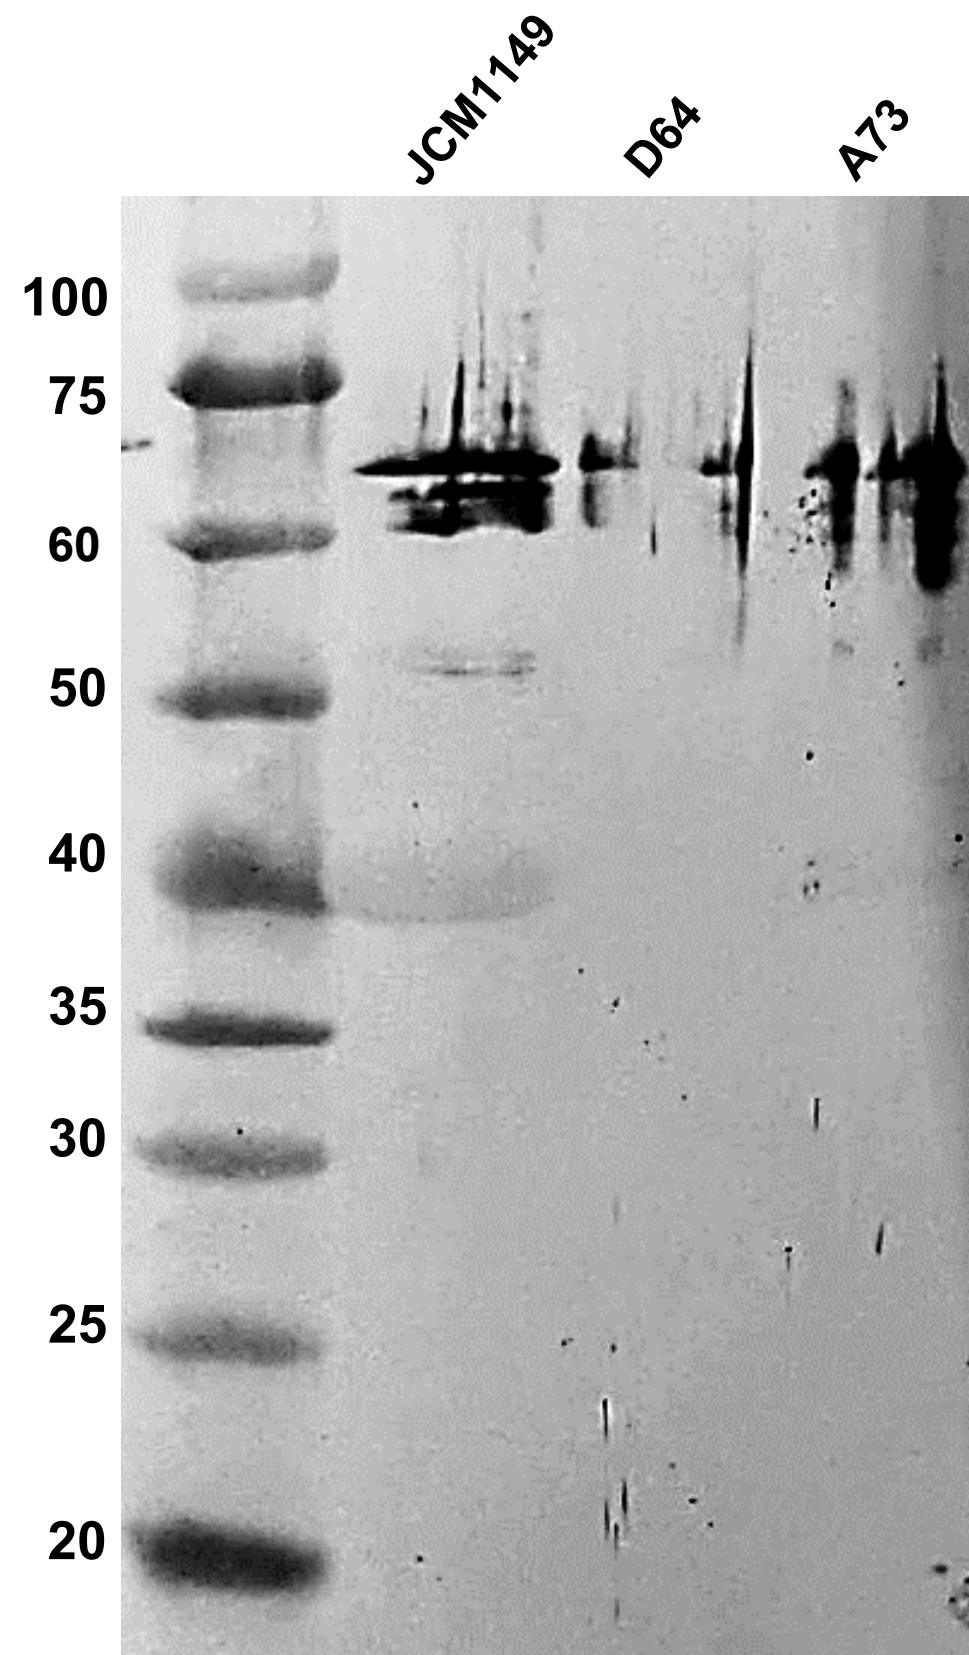

**Fig. S2.** Western blotting analyses of Slps in *L. plantarum* JCM 1149, D64 and A73.

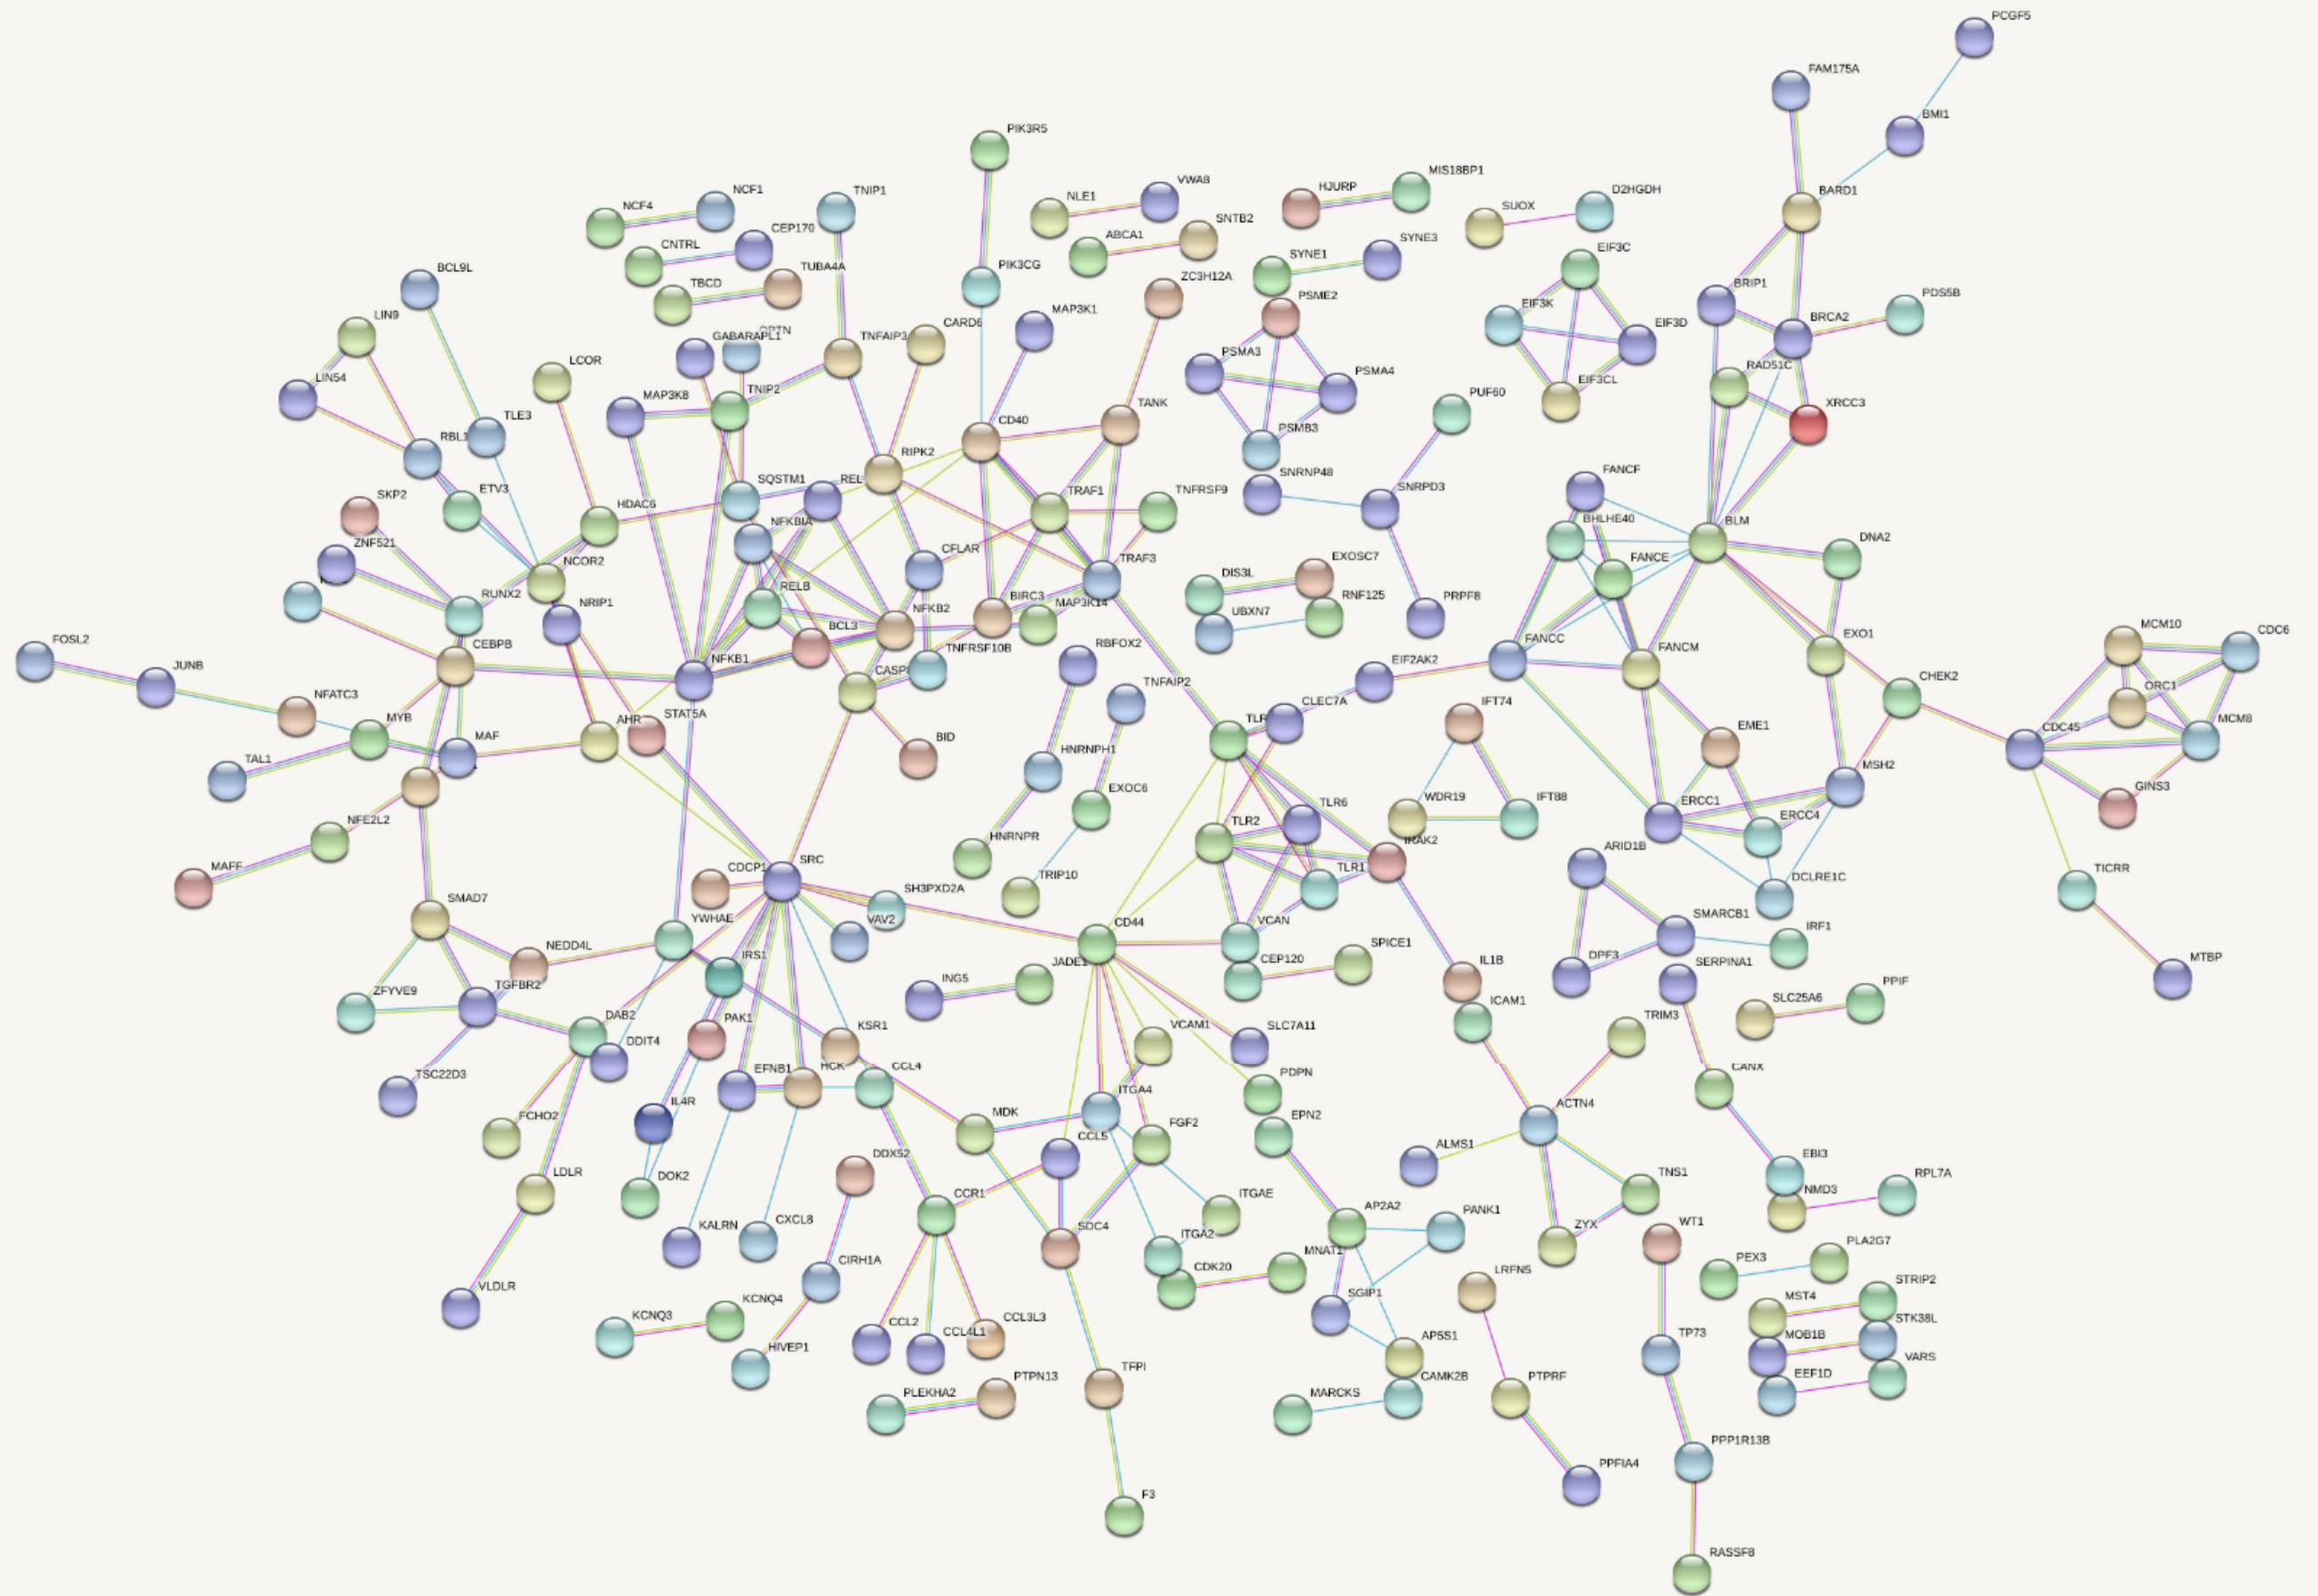

**Fig. S3.** Whole network detected in upregulated and downregulated gene expressions in THP-1 DC by the treatment with GAPDH.
