# Supplementary material for: Immunomodulatory effects of extracellular glyceraldehyde 3-phosphate dehydrogenase of exopolysaccharide-producing Lactiplantibacillus plantarum JCM 1149
Source: Royal Society of Chemistry journal article supplement (doi:10.1039/d2fo02927h), 2022-12-15
Supplement: d2fo02927h2.pdf [file d2fo02927h2.pdf]

**a=highest in protein**

**b=highest in EPS**

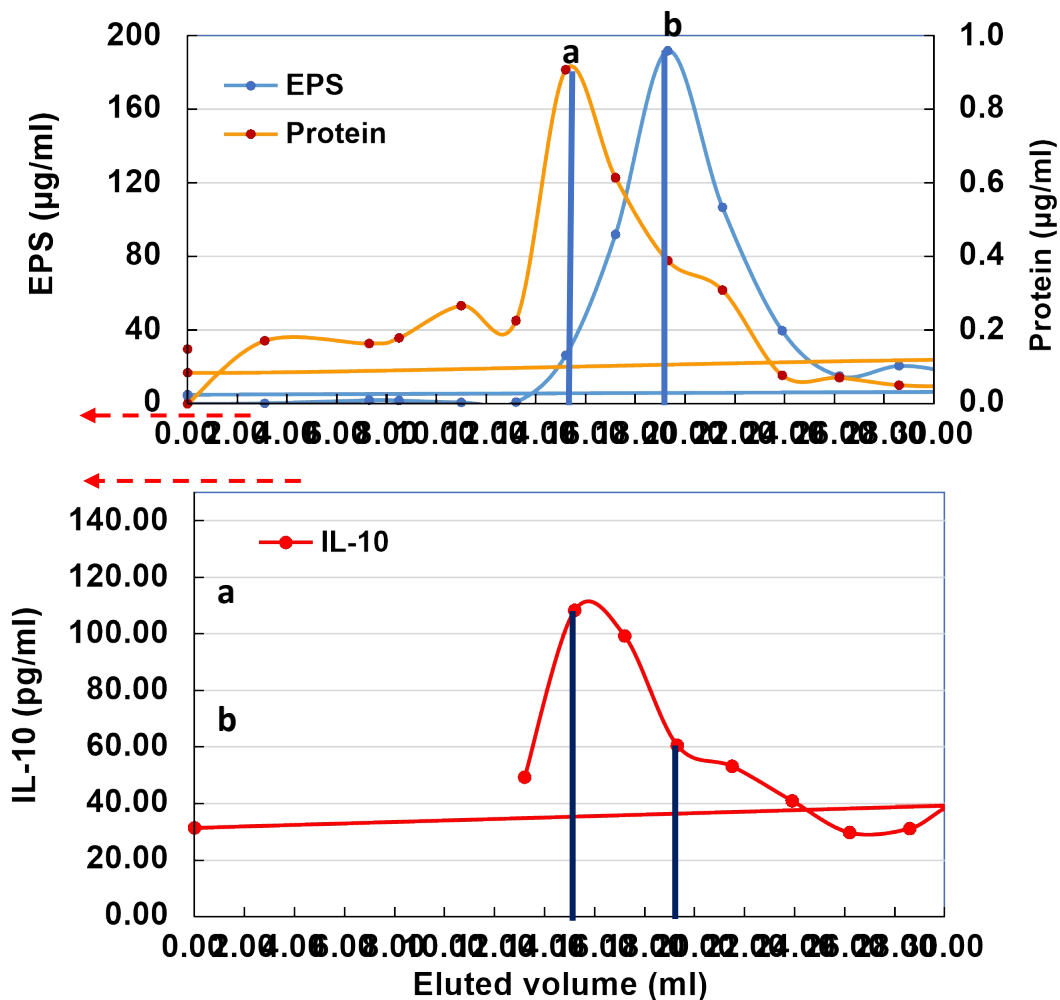

**(Total activity at a) = (Activity by Protein at a) + (Activity by EPS at a)**

Total activity at a (IL-10) = 110 pg/ml  
 = (Activity by Protein)a + (Activity by EPS) b  
 = 0.9 (µg/ml) x A + 20 (µg/ml) x B ----- (A)

A= coefficient; activity by protein per concentration (pg/ml)/(µg/ml)

B= Coefficient; activity by EPS per concentration (pg/ml)/(ug/ml)

**(Total activity at b) = (Activity by Protein at b) + (Activity by EPS at b)**

Total activity(IL-10) = 60 pg/ml  
 = (Activity by Protein)a + (Activity by EPS) b  
 = 0.4 (µg/ml) x A + 180 (µg/ml) x B ----- (B)

From (A) and (B)  
 A is 120.1 pg/ml/ µg protein/ml  
 B is 0.065 pg/ml/ µg EPS/ml

From (A) and (B)  
 Coefficient A is 120.1 (pg/ml)/ (μg protein/ml)  
 Coefficient B is 0.065 (pg/ml)/ (μg EPS/ml)

From coefficients A and B Activity (Protein) and Activity (EPS) estimated are showed in following Fig.

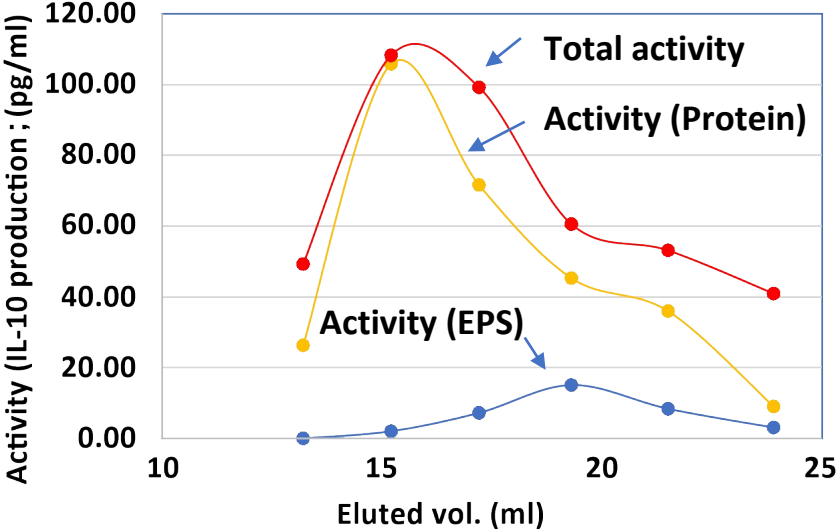

**Predicted activities of Protein and EPS**

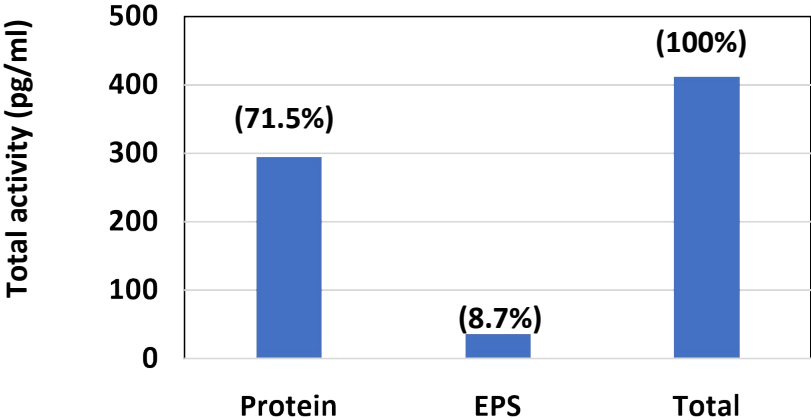

**Estimated contribution of total Protein and EPS**

Contribution of Protein on IL-10 inducing activity was estimated as 71.5%.

Fig. S4. Estimated contributions of protein and EPS on IL-10 inducing activities of fractions of gel filtration (Bio-gel P-100) and combined activity.
