# Supplementary material for: Immunomodulatory effects of extracellular glyceraldehyde 3-phosphate dehydrogenase of exopolysaccharide-producing Lactiplantibacillus plantarum JCM 1149
Source: Royal Society of Chemistry journal article supplement (doi:10.1039/d2fo02927h), 2022-12-15
Supplement: d2fo02927h3.xlsx [file d2fo02927h3.xlsx]

## Sheet: Sheet1
	Supplementary Table 1. Sets of primers for RT-PCR amplifications.
	Primer name	sequence (5'->3')	Length (bp)	product size (bp)
	Human_actin beta_F	TGGCACCCAGCACAATGAA	19	186
	Human_actin beta_R	CTAAGTCATAGTCCGCCTAGAAGCA	25
	Human_TLR2_F	GGCGTTCTCTCAGGTGACTG	20	119
	Human_TLR2_R	TGTCTTCCTGCCTTCACTTGG	21
	Human_TLR4_F	TCCTGCGTGAGACCAGAAAG	20	125
	Human_TLR4_R	AATGGAATCGGGGTGAAGGG	20
	Human_MAPK1_F	TTCCCAGTTCTTGACCCCTG	20	100
	Human_MAPK1_R	GCCACAACTACCAGAAACCG	20
	Human_JUN_F	GTGCCGAAAAAGGAAGCTGG	20	175
	Human_JUN_R	CTGCGTTAGCATGAGTTGGC	20
	Human_STAT3_F	CTGGCCCCTTGGATTGAGAG	20	216
	Human_STAT3_R	CACAATCCGGGCAATCTCCA	20
	Human_STAT5A_F	AATGAACAGAGGCTGGTCCG	20	201
	Human_STAT5A_R	CCTCAGGCTCTCCTGGTACT	20
	Human_IL1B_F	CTCTGGGATTCTCTTCAGCCA	21	227
	Human_IL1B_R	TTGCTGTAGTGGTGGTCGG	19
	Human_IL-10_F	CTTCGAGATCTCCGAGATGCCTTC	24	121
	Human_IL-10_R	GGATCATCTCAGACAAGGCTTGGC	24
	Human_TNFAIP3_F	GCCGCCAAGAGAGATCACA	19	149
	Human_TNFAIP3_R	TTCGCAAAGTCCCAAGTCCT	20
	Human_NFKBIA_F	AAGTGATCCGCCAGGTGAAG	20	188
	Human_NFKBIA_R	CTGCTCACAGGCAAGGTGTA	20
	Human_NFKB1_F	ACCCGGCTTCAGAATGGC	18	209
	Human_NFKB1_R	GGGATGGGCCTTCACATACA	20
	Human_CD40_F	ACTGATGTTGTCTGTGGTCCC	21	118
	Human_CD40_R	TCTTGGCCACCTTTTTGATAAAGAC	25
	Human_CXCL1_F	TTGTGAAGGCAGGGGAATGT	20	231
	Human_CXCL1_R	AAGCCCCTTTGTTCTAAGCCA	21
