# Supplementary material for: Immunomodulatory effects of extracellular glyceraldehyde 3-phosphate dehydrogenase of exopolysaccharide-producing Lactiplantibacillus plantarum JCM 1149
Source: Royal Society of Chemistry journal article supplement (doi:10.1039/d2fo02927h), 2022-12-15
Supplement: d2fo02927h4.pdf [file d2fo02927h4.pdf]

Supplementary Table 2. Upregulated gene expressions in THP-1 DC by treatment with GAPDH

| PBS  | GAPDH | GPADH/PBS | Gene     | Product                                                                                              |
|------|-------|-----------|----------|------------------------------------------------------------------------------------------------------|
| 117  | 1309  | 11.19     | EEF1D    | eukaryotic translation elongation factor 1 delta, transcript variant X2                              |
| 182  | 1642  | 9.02      | SQSTM1   | sequestosome 1, transcript variant 1                                                                 |
| 249  | 1862  | 7.48      | MARCKS   | myristoylated alanine rich protein kinase C substrate                                                |
| 338  | 2257  | 6.68      | BIRC3    | baculoviral IAP repeat containing 3, transcript variant 1                                            |
| 101  | 487   | 4.82      | YWHAE    | tyrosine 3-monooxygenase/tryptophan 5-monooxygenase activation protein epsilon, transcript variant 2 |
| 220  | 1029  | 4.68      | ACTN4    | actinin alpha 4, transcript variant 1                                                                |
| 3072 | 14017 | 4.56      | SOD2     | superoxide dismutase 2, transcript variant 1                                                         |
| 107  | 488   | 4.56      | CXCL1    | C-X-C motif chemokine ligand 1, transcript variant 2                                                 |
| 124  | 545   | 4.40      | TNFAIP2  | TNF alpha induced protein 2, transcript variant X6                                                   |
| 1318 | 5704  | 4.33      | TRAF1    | TNF receptor associated factor 1, transcript variant 3                                               |
| 102  | 410   | 4.02      | EIF3K    | eukaryotic translation initiation factor 3 subunit K, transcript variant 1                           |
| 208  | 800   | 3.85      | MCOLN2   | mucolipin 2, transcript variant X3                                                                   |
| 402  | 1487  | 3.70      | PUF60    | poly(U) binding splicing factor 60, transcript variant 5                                             |
| 171  | 613   | 3.58      | TDO2     | tryptophan 2,3-dioxygenase                                                                           |
| 112  | 382   | 3.41      | MIR10392 | hsa-miR-10392-3p                                                                                     |
| 1555 | 5277  | 3.39      | SERPINE2 | serpin family E member 2, transcript variant 2                                                       |
| 1380 | 4610  | 3.34      | EHD1     | EH domain containing 1, transcript variant 1                                                         |
| 293  | 944   | 3.22      | ABTB2    | ankyrin repeat and BTB domain containing 2                                                           |
| 183  | 568   | 3.10      | BMP8A    | bone morphogenetic protein 8a                                                                        |
| 114  | 351   | 3.08      | DDIT4    | DNA damage inducible transcript 4                                                                    |
| 429  | 1298  | 3.03      | IRAK2    | interleukin 1 receptor associated kinase 2                                                           |
| 201  | 603   | 3.00      | CD40     | CD40 molecule, transcript variant X5                                                                 |
| 105  | 314   | 2.99      | VCAM1    | vascular cell adhesion molecule 1, transcript variant 3                                              |
| 398  | 1172  | 2.94      | BCL3     | BCL3 transcription coactivator, transcript variant X2                                                |
| 162  | 477   | 2.94      | SNN      | stannin                                                                                              |
| 106  | 300   | 2.83      | N4BP2L1  | NEDD4 binding protein 2 like 1, transcript variant 5                                                 |
| 732  | 2039  | 2.79      | SRC      | SRC proto-oncogene, non-receptor tyrosine kinase, transcript variant 2                               |
| 442  | 1213  | 2.74      | CCL3L3   | C-C motif chemokine ligand 3 like 3                                                                  |
| 233  | 627   | 2.69      | CXCL3    | C-X-C motif chemokine ligand 3                                                                       |
| 2022 | 5289  | 2.62      | TNFAIP3  | TNF alpha induced protein 3, transcript variant X6                                                   |
| 186  | 483   | 2.60      | CCL1     | C-C motif chemokine ligand 1                                                                         |
| 7238 | 18569 | 2.57      | ICAM1    | intercellular adhesion molecule 1                                                                    |
| 329  | 833   | 2.53      | CYP7B1   | cytochrome P450 family 7 subfamily B member 1, transcript variant X1                                 |
| 766  | 1938  | 2.53      | CD83     | CD83 molecule, transcript variant 3                                                                  |
| 157  | 394   | 2.51      | STX11    | syntaxin 11, transcript variant X1                                                                   |
| 122  | 294   | 2.41      | RCC2     | regulator of chromosome condensation 2, transcript variant 1                                         |
| 683  | 1645  | 2.41      | KYNU     | kynureninase, transcript variant 3                                                                   |
| 5187 | 12476 | 2.41      | CXCL8    | C-X-C motif chemokine ligand 8, transcript variant 2                                                 |
| 1445 | 3462  | 2.40      | ZC3H12C  | zinc finger CCCH-type containing 12C                                                                 |
| 134  | 320   | 2.39      | ELOVL7   | ELOVL fatty acid elongase 7, transcript variant 2                                                    |
| 202  | 477   | 2.36      | SSBP1    | single stranded DNA binding protein 1, transcript variant X2                                         |
| 477  | 1124  | 2.36      | GIMAP8   | GTPase, IMAP family member 8, transcript variant X2                                                  |
| 903  | 2103  | 2.33      | CCL3P1   |                                                                                                      |
| 348  | 808   | 2.32      | REL      | REL proto-oncogene, NF-kB subunit, transcript variant X2                                             |
| 190  | 441   | 2.32      | KCNQ4    | potassium voltage-gated channel subfamily Q member 4, transcript variant 2                           |
| 335  | 773   | 2.31      | CFLAR    | CASP8 and FADD like apoptosis regulator, transcript variant 13                                       |
| 1069 | 2424  | 2.27      | STAT5A   | signal transducer and activator of transcription 5A, transcript variant 2                            |
| 102  | 231   | 2.26      | CLDN1    | claudin 1                                                                                            |
| 1035 | 2335  | 2.26      | NINJ1    | ninjurin 1, transcript variant X1                                                                    |
| 109  | 245   | 2.25      | KCNN2    | potassium calcium-activated channel subfamily N member 2, transcript variant 1                       |
| 395  | 884   | 2.24      | EBI3     | Epstein-Barr virus induced 3, transcript variant X1                                                  |
| 952  | 2119  | 2.23      | CCL3L1   | C-C motif chemokine ligand 3 like 1, transcript variant 2                                            |
| 508  | 1115  | 2.19      | GPR35    | G protein-coupled receptor 35, transcript variant 1                                                  |
| 128  | 276   | 2.16      | IFI27L2  | interferon alpha inducible protein 27 like 2                                                         |
| 262  | 563   | 2.15      | ABR      | ABR activator of RhoGEF and GTPase, transcript variant 3                                             |
| 930  | 1975  | 2.12      | ZC3H12A  | zinc finger CCCH-type containing 12A, transcript variant 1                                           |
| 1341 | 2820  | 2.10      | PVR      | PVR cell adhesion molecule, transcript variant 1                                                     |
| 111  | 232   | 2.09      | EEF2K    | eukaryotic elongation factor 2 kinase                                                                |
| 1146 | 2378  | 2.08      | TNIP1    | TNFAIP3 interacting protein 1, transcript variant X2                                                 |
| 2770 | 5739  | 2.07      | NFKBIA   | NFKB inhibitor alpha                                                                                 |
| 1381 | 2854  | 2.07      | NFKB1    | nuclear factor kappa B subunit 1, transcript variant 1                                               |
| 302  | 621   | 2.06      | FGF2     | fibroblast growth factor 2                                                                           |
| 162  | 333   | 2.06      | CCL4L1   | C-C motif chemokine ligand 4 like 1, transcript variant CCL4L                                        |
| 158  | 323   | 2.04      | PDXDC1   | pyridoxal dependent decarboxylase domain containing 1, transcript variant X2                         |
| 979  | 1981  | 2.02      | MAFF     | MAF bZIP transcription factor F, transcript variant 3                                                |
| 287  | 580   | 2.02      | NAP1L4   | nucleosome assembly protein 1 like 4, transcript variant 11                                          |
| 228  | 458   | 2.01      | UNC13A   | unc-13 homolog A, transcript variant X2                                                              |
| 570  | 1128  | 1.98      | G0S2     | G0/G1 switch 2                                                                                       |
| 154  | 301   | 1.95      | LSS      | lanosterol synthase, transcript variant 3                                                            |
| 1533 | 2985  | 1.95      | POU2F2   | POU class 2 homeobox 2, transcript variant X20                                                       |

|       |       |      |            |                                                                                          |
|-------|-------|------|------------|------------------------------------------------------------------------------------------|
| 227   | 442   | 1.95 | CD274      | CD274 molecule, transcript variant 2                                                     |
| 1470  | 2846  | 1.94 | NFKB2      | nuclear factor kappa B subunit 2, transcript variant X4                                  |
| 757   | 1451  | 1.92 | RELB       | RELB proto-oncogene, NF-kB subunit, transcript variant X2                                |
| 1807  | 3456  | 1.91 | TNFAIP8    | TNF alpha induced protein 8, transcript variant 3                                        |
| 2129  | 4064  | 1.91 | AMPD3      | adenosine monophosphate deaminase 3, transcript variant 2                                |
| 148   | 277   | 1.87 | ICOSLG     | inducible T cell costimulator ligand, transcript variant 3                               |
| 103   | 192   | 1.86 | SERPINA1   | serpin family A member 1, transcript variant 5                                           |
| 136   | 253   | 1.86 | CRIM1      | cysteine rich transmembrane BMP regulator 1, transcript variant X9                       |
| 118   | 217   | 1.84 | GIMAP5     | GTPase, IMAP family member 5                                                             |
| 413   | 757   | 1.83 | KLF5       | Kruppel like factor 5, transcript variant 1                                              |
| 932   | 1705  | 1.83 | NUB1       | negative regulator of ubiquitin like proteins 1, transcript variant 1                    |
| 120   | 219   | 1.83 | GIMAP1-GIM | GIMAP1-GIMAP5 readthrough, transcript variant 2                                          |
| 4535  | 8224  | 1.81 | MFSD2A     | major facilitator superfamily domain containing 2A, transcript variant 5                 |
| 209   | 379   | 1.81 | TNFRSF9    | TNF receptor superfamily member 9                                                        |
| 2228  | 4040  | 1.81 | ATP1B1     | ATPase Na <sup>+</sup> /K <sup>+</sup> transporting subunit beta 1                       |
| 132   | 239   | 1.81 | CCL4       | C-C motif chemokine ligand 4                                                             |
| 515   | 929   | 1.80 | ZYX        | zyxin, transcript variant 3                                                              |
| 116   | 209   | 1.80 | PXDC1      | PX domain containing 1, transcript variant X2                                            |
| 962   | 1733  | 1.80 | OLR1       | oxidized low density lipoprotein receptor 1, transcript variant 1                        |
| 1812  | 3262  | 1.80 | CCL20      | C-C motif chemokine ligand 20, transcript variant 1                                      |
| 17351 | 31232 | 1.80 | IL1B       | interleukin 1 beta, transcript variant X1                                                |
| 2546  | 4556  | 1.79 | IL4I1      | interleukin 4 induced 1, transcript variant 1                                            |
| 123   | 218   | 1.77 | FLVCR2     | feline leukemia virus subgroup C cellular receptor family member 2, transcript variant 2 |
| 8433  | 14841 | 1.76 | BTG2       | BTG anti-proliferation factor 2                                                          |
| 1200  | 2100  | 1.75 | SAT1       | spermidine/spermine N1-acetyltransferase 1, transcript variant 2                         |
| 551   | 953   | 1.73 | MIR4751    | hsa-miR-4751                                                                             |
| 139   | 240   | 1.73 | LIF        | LIF interleukin 6 family cytokine, transcript variant X1                                 |
| 2688  | 4631  | 1.72 | RNA28SN4   | RNA, 28S ribosomal RNA N4                                                                |
| 539   | 925   | 1.72 | RNF19B     | ring finger protein 19B, transcript variant X1                                           |
| 2788  | 4773  | 1.71 | RNA45SN4   | RNA, 45S pre-ribosomal N4                                                                |
| 144   | 245   | 1.70 | NCF1C      | neutrophil cytosolic factor 1C pseudogene                                                |
| 440   | 746   | 1.70 | MOB3C      | MOB kinase activator 3C, transcript variant 1                                            |
| 167   | 283   | 1.69 | NLGN4Y     | neuroligin 4 Y-linked, transcript variant X15                                            |
| 563   | 953   | 1.69 | LOC1005074 | uncharacterized LOC100507403, transcript variant X6                                      |
| 809   | 1369  | 1.69 | KDM6B      | lysine demethylase 6B, transcript variant X7                                             |
| 591   | 998   | 1.69 | FRY        | FRY microtubule binding protein, transcript variant X4                                   |
| 417   | 701   | 1.68 | PTGER4     | prostaglandin E receptor 4, transcript variant X4                                        |
| 561   | 941   | 1.68 | TNIP2      | TNFAIP3 interacting protein 2, transcript variant 1                                      |
| 1067  | 1775  | 1.66 | PCGF5      | polycomb group ring finger 5, transcript variant X3                                      |
| 767   | 1275  | 1.66 | MGLL       | monoglyceride lipase, transcript variant X12                                             |
| 311   | 516   | 1.66 | ETV3L      | ETS variant 3 like, transcript variant X1                                                |
| 399   | 662   | 1.66 | DENND3     | DENN domain containing 3, transcript variant X16                                         |
| 308   | 510   | 1.66 | NR4A3      | nuclear receptor subfamily 4 group A member 3, transcript variant X1                     |
| 2040  | 3370  | 1.65 | MSC        | musculin                                                                                 |
| 5337  | 8807  | 1.65 | RGS16      | regulator of G protein signaling 16, transcript variant X1                               |
| 1803  | 2949  | 1.64 | TLR2       | toll like receptor 2, transcript variant X1                                              |
| 326   | 533   | 1.63 | ESPL1      | extra spindle pole bodies like 1, separase, transcript variant X5                        |
| 104   | 170   | 1.63 | ANKRD1     | ankyrin repeat domain 1                                                                  |
| 288   | 470   | 1.63 | ECE1       | endothelin converting enzyme 1, transcript variant 4                                     |
| 111   | 181   | 1.63 | RBFOX2     | RNA binding fox-1 homolog 2, transcript variant 6                                        |
| 148   | 241   | 1.63 | CHST2      | carbohydrate sulfotransferase 2                                                          |
| 214   | 348   | 1.63 | MPND       | MPN domain containing, transcript variant 2                                              |
| 247   | 401   | 1.62 | IL7R       | interleukin 7 receptor, transcript variant X1                                            |
| 282   | 456   | 1.62 | MAP3K8     | mitogen-activated protein kinase kinase kinase 8, transcript variant 3                   |
| 200   | 323   | 1.62 | TFAP2A     | transcription factor AP-2 alpha, transcript variant 1                                    |
| 257   | 414   | 1.61 | WT1        | WT1 transcription factor, transcript variant G                                           |
| 131   | 211   | 1.61 | UTP4       | UTP4 small subunit processome component, transcript variant X1                           |
| 133   | 214   | 1.61 | LOC1053780 | uncharacterized LOC105378047                                                             |
| 204   | 328   | 1.61 | GABARAPL1  | GABA type A receptor associated protein like 1, transcript variant 1                     |
| 5376  | 8642  | 1.61 | ATF5       | activating transcription factor 5, transcript variant 3                                  |
| 2746  | 4396  | 1.60 | JUNB       | JunB proto-oncogene, AP-1 transcription factor subunit                                   |
| 2965  | 4745  | 1.60 | PIM3       | Pim-3 proto-oncogene, serine/threonine kinase                                            |
| 4078  | 6486  | 1.59 | ALAS1      | 5'-aminolevulinate synthase 1, transcript variant X4                                     |
| 271   | 430   | 1.59 | CCL2       | C-C motif chemokine ligand 2                                                             |
| 333   | 528   | 1.59 | RHOF       | ras homolog family member F, filopodia associated                                        |
| 721   | 1135  | 1.57 | TJP2       | tight junction protein 2, transcript variant 5                                           |
| 451   | 709   | 1.57 | EPB41L3    | erythrocyte membrane protein band 4.1 like 3, transcript variant 2                       |
| 551   | 866   | 1.57 | PRKD3      | protein kinase D3, transcript variant X5                                                 |
| 1749  | 2748  | 1.57 | TIPARP     | TCDD inducible poly(ADP-ribose) polymerase, transcript variant 1                         |
| 508   | 794   | 1.56 | TNFRSF10B  | TNF receptor superfamily member 10b, transcript variant 2                                |
| 134   | 209   | 1.56 | GCH1       | GTP cyclohydrolase 1, transcript variant 1                                               |
| 1431  | 2231  | 1.56 | PLK3       | polo like kinase 3                                                                       |

|       |       |      |              |                                                                                            |
|-------|-------|------|--------------|--------------------------------------------------------------------------------------------|
| 6558  | 10216 | 1.56 | CSF1         | colony stimulating factor 1, transcript variant 3                                          |
| 133   | 207   | 1.56 | LOC728743    | zinc finger protein pseudogene                                                             |
| 1614  | 2503  | 1.55 | SDC4         | syndecan 4, transcript variant X1                                                          |
| 759   | 1177  | 1.55 | IFNGR2       | interferon gamma receptor 2, transcript variant X2                                         |
| 162   | 251   | 1.55 | MYB          | MYB proto-oncogene, transcription factor, transcript variant 13                            |
| 6989  | 10733 | 1.54 | CYP1B1       | cytochrome P450 family 1 subfamily B member 1                                              |
| 120   | 184   | 1.53 | PVT1         | Pvt1 oncogene                                                                              |
| 367   | 562   | 1.53 | HCK          | HCK proto-oncogene, Src family tyrosine kinase, transcript variant 3                       |
| 2183  | 3339  | 1.53 | CEBPB        | CCAAT enhancer binding protein beta, transcript variant 1                                  |
| 272   | 416   | 1.53 | LHX2         | LIM homeobox 2                                                                             |
| 105   | 160   | 1.52 | SIX5         | SIX homeobox 5                                                                             |
| 1173  | 1780  | 1.52 | BCL9L        | BCL9 like, transcript variant X5                                                           |
| 163   | 247   | 1.52 | VAV2         | vav guanine nucleotide exchange factor 2, transcript variant X7                            |
| 2762  | 4184  | 1.51 | USP12        | ubiquitin specific peptidase 12, transcript variant X3                                     |
| 916   | 1380  | 1.51 | YBX3         | Y-box binding protein 3, transcript variant X4                                             |
| 105   | 158   | 1.50 | SVIL         | supervillin, transcript variant X17                                                        |
| 4128  | 6207  | 1.50 | OGFRL1       | opioid growth factor receptor like 1, transcript variant 1                                 |
| 367   | 551   | 1.50 | GPR132       | G protein-coupled receptor 132, transcript variant 1                                       |
| 689   | 1034  | 1.50 | RIPK2        | receptor interacting serine/threonine kinase 2, transcript variant X1                      |
| 182   | 273   | 1.50 | CD70         | CD70 molecule, transcript variant 1                                                        |
| 616   | 923   | 1.50 | SLC16A6      | solute carrier family 16 member 6, transcript variant 1                                    |
| 237   | 355   | 1.50 | PTP4A3       | protein tyrosine phosphatase 4A3, transcript variant 2                                     |
| 131   | 196   | 1.50 | LOC101929932 |                                                                                            |
| 117   | 175   | 1.50 | SLC9B2       | solute carrier family 9 member B2, transcript variant 6                                    |
| 654   | 976   | 1.49 | CD58         | CD58 molecule, transcript variant 2                                                        |
| 104   | 155   | 1.49 | PLA2G7       | phospholipase A2 group VII, transcript variant 2                                           |
| 2895  | 4310  | 1.49 | ETV3         | ETS variant 3, transcript variant X1                                                       |
| 170   | 253   | 1.49 | RRAD         | RRAD, Ras related glycolysis inhibitor and calcium channel regulator, transcript variant 1 |
| 168   | 249   | 1.48 | LRG1         | leucine rich alpha-2-glycoprotein 1                                                        |
| 246   | 364   | 1.48 | TRIM47       | tripartite motif containing 47, transcript variant X2                                      |
| 799   | 1179  | 1.48 | TRIP10       | thyroid hormone receptor interactor 10, transcript variant 1                               |
| 220   | 324   | 1.47 | BOLA2        | bola family member 2, transcript variant 3                                                 |
| 2222  | 3268  | 1.47 | ATP2B1       | ATPase plasma membrane Ca2+ transporting 1, transcript variant X4                          |
| 119   | 175   | 1.47 | 44629        | membrane associated ring-CH-type finger 9                                                  |
| 100   | 147   | 1.47 | PPFIBP2      | PPFIA binding protein 2, transcript variant 2                                              |
| 520   | 760   | 1.46 | RASSF4       | Ras association domain family member 4, transcript variant X10                             |
| 813   | 1188  | 1.46 | NRP2         | neuropilin 2, transcript variant 5                                                         |
| 140   | 204   | 1.46 | HIVEP1       | human immunodeficiency virus type I enhancer binding protein 1, transcript variant X3      |
| 1405  | 2046  | 1.46 | DUSP4        | dual specificity phosphatase 4, transcript variant X1                                      |
| 144   | 209   | 1.45 | SEMA4A       | semaphorin 4A, transcript variant X1                                                       |
| 1056  | 1529  | 1.45 | STK26        | serine/threonine kinase 26, transcript variant 3                                           |
| 271   | 392   | 1.45 | LOC730101    | uncharacterized LOC730101, transcript variant 1                                            |
| 1577  | 2278  | 1.44 | B4GALT5      | beta-1,4-galactosyltransferase 5                                                           |
| 108   | 156   | 1.44 | DUXAP8       | double homeobox A pseudogene 8                                                             |
| 1715  | 2475  | 1.44 | BHLHE40      | basic helix-loop-helix family member e40                                                   |
| 121   | 174   | 1.44 | BMP6         | bone morphogenetic protein 6                                                               |
| 103   | 148   | 1.44 | ZNF169       | zinc finger protein 169, transcript variant 1                                              |
| 633   | 909   | 1.44 | BAHCC1       | BAH domain and coiled-coil containing 1, transcript variant X3                             |
| 4874  | 6999  | 1.44 | INSIG1       | insulin induced gene 1, transcript variant 4                                               |
| 1072  | 1538  | 1.43 | ZC3H12D      | zinc finger CCCH-type containing 12D                                                       |
| 490   | 703   | 1.43 | NRG1         | neuregulin 1, transcript variant X11                                                       |
| 274   | 393   | 1.43 | PLD6         | phospholipase D family member 6                                                            |
| 282   | 404   | 1.43 | LOC1053755   | uncharacterized LOC105375566, transcript variant X6                                        |
| 1332  | 1900  | 1.43 | CPNE8        | copine 8, transcript variant X2                                                            |
| 1648  | 2349  | 1.43 | IL10RA       | interleukin 10 receptor subunit alpha, transcript variant X1                               |
| 249   | 354   | 1.42 | CNKSR3       | CNKSR family member 3, transcript variant 4                                                |
| 771   | 1094  | 1.42 | PHF19        | PHD finger protein 19, transcript variant X3                                               |
| 103   | 146   | 1.42 | LYRM4        | LYR motif containing 4, transcript variant X1                                              |
| 127   | 180   | 1.42 | GATAD2B      | GATA zinc finger domain containing 2B, transcript variant X2                               |
| 135   | 191   | 1.41 | KCNQ3        | potassium voltage-gated channel subfamily Q member 3, transcript variant 1                 |
| 1371  | 1937  | 1.41 | UXS1         | UDP-glucuronate decarboxylase 1, transcript variant 3                                      |
| 134   | 189   | 1.41 | OSGIN1       | oxidative stress induced growth inhibitor 1                                                |
| 139   | 196   | 1.41 | EBF1         | EBF transcription factor 1, transcript variant 15                                          |
| 11468 | 16153 | 1.41 | TMEM123      | transmembrane protein 123                                                                  |
| 1580  | 2223  | 1.41 | PIK3R5       | phosphoinositide-3-kinase regulatory subunit 5, transcript variant 4                       |
| 633   | 890   | 1.41 | SLC7A11      | solute carrier family 7 member 11, transcript variant X1                                   |
| 728   | 1023  | 1.41 | CYP27B1      | cytochrome P450 family 27 subfamily B member 1                                             |
| 238   | 334   | 1.40 | UNKL         | unk like zinc finger, transcript variant 10                                                |
| 442   | 620   | 1.40 | FOSL2        | FOS like 2, AP-1 transcription factor subunit, transcript variant X3                       |
| 2733  | 3833  | 1.40 | FAM107B      | family with sequence similarity 107 member B, transcript variant X3                        |
| 3250  | 4542  | 1.40 | RCN1         | reticulocalbin 1                                                                           |
| 1097  | 1532  | 1.40 | MAP2K3       | mitogen-activated protein kinase kinase 3, transcript variant X3                           |

|       |       |      |            |                                                                                        |
|-------|-------|------|------------|----------------------------------------------------------------------------------------|
| 129   | 180   | 1.40 | SLC7A2     | solute carrier family 7 member 2, transcript variant 5                                 |
| 3044  | 4246  | 1.39 | NFE2L2     | nuclear factor, erythroid 2 like 2, transcript variant 8                               |
| 180   | 251   | 1.39 | TBX3       | T-box transcription factor 3, transcript variant 1                                     |
| 322   | 448   | 1.39 | LRFN5      | leucine rich repeat and fibronectin type III domain containing 5, transcript variant 3 |
| 228   | 317   | 1.39 | TSC22D3    | TSC22 domain family member 3, transcript variant 3                                     |
| 321   | 446   | 1.39 | MIR636     | microRNA 636                                                                           |
| 3976  | 5519  | 1.39 | ZEB2       | zinc finger E-box binding homeobox 2, transcript variant 1                             |
| 725   | 1006  | 1.39 | NCF1       | neutrophil cytosolic factor 1                                                          |
| 119   | 165   | 1.39 | SMAD1      | SMAD family member 1, transcript variant 4                                             |
| 425   | 589   | 1.39 | PRPF8      | pre-mRNA processing factor 8                                                           |
| 146   | 202   | 1.38 | PDCD1LG2   | programmed cell death 1 ligand 2                                                       |
| 422   | 583   | 1.38 | PDPN       | podoplanin, transcript variant X3                                                      |
| 278   | 384   | 1.38 | MAML1      | mastermind like domain containing 1, transcript variant X4                             |
| 842   | 1162  | 1.38 | LDLR       | low density lipoprotein receptor, transcript variant 4                                 |
| 410   | 565   | 1.38 | CHST7      | carbohydrate sulfotransferase 7                                                        |
| 346   | 476   | 1.38 | FKBP5      | FKBP prolyl isomerase 5, transcript variant 4                                          |
| 1135  | 1560  | 1.37 | TPRA1      | transmembrane protein adipocyte associated 1, transcript variant 10                    |
| 1051  | 1444  | 1.37 | AHR        | aryl hydrocarbon receptor                                                              |
| 340   | 467   | 1.37 | RASSF8     | Ras association domain family member 8, transcript variant 3                           |
| 1849  | 2538  | 1.37 | PARM1      | prostate androgen-regulated mucin-like protein 1, transcript variant X1                |
| 2554  | 3505  | 1.37 | RFTN1      | raftlin, lipid raft linker 1, transcript variant X5                                    |
| 627   | 859   | 1.37 | GRAMD1A    | GRAM domain containing 1A, transcript variant X9                                       |
| 146   | 200   | 1.37 | FAM118A    | family with sequence similarity 118 member A, transcript variant 3                     |
| 736   | 1008  | 1.37 | OPTN       | optineurin, transcript variant 1                                                       |
| 195   | 267   | 1.37 | TAF4B      | TATA-box binding protein associated factor 4b, transcript variant X1                   |
| 1739  | 2381  | 1.37 | TRAF3      | TNF receptor associated factor 3, transcript variant 4                                 |
| 168   | 230   | 1.37 | MCTP1      | multiple C2 and transmembrane domain containing 1, transcript variant X19              |
| 271   | 371   | 1.37 | LOC1122683 | polycystin-1-like                                                                      |
| 137   | 187   | 1.36 | NUTM2B-AS  | NUTM2B antisense RNA 1, transcript variant 2                                           |
| 681   | 929   | 1.36 | BTG3       | BTG anti-proliferation factor 3, transcript variant X2                                 |
| 171   | 233   | 1.36 | PTEN       | phosphatase and tensin homolog, transcript variant 1                                   |
| 272   | 370   | 1.36 | TMEM52B    | transmembrane protein 52B, transcript variant 2                                        |
| 234   | 318   | 1.36 | PDS1       | decaprenyl diphosphate synthase subunit 1, transcript variant X1                       |
| 1336  | 1814  | 1.36 | ELL2       | elongation factor for RNA polymerase II 2, transcript variant X1                       |
| 1691  | 2295  | 1.36 | BID        | BH3 interacting domain death agonist, transcript variant 7                             |
| 653   | 886   | 1.36 | HNRNPH1    | heterogeneous nuclear ribonucleoprotein H1, transcript variant 31                      |
| 160   | 217   | 1.36 | RCN1P2     |                                                                                        |
| 105   | 142   | 1.35 | ARHGAP23   | Rho GTPase activating protein 23, transcript variant X6                                |
| 248   | 335   | 1.35 | SLC39A8    | solute carrier family 39 member 8, transcript variant X4                               |
| 297   | 401   | 1.35 | SLC1A3     | solute carrier family 1 member 3, transcript variant 3                                 |
| 884   | 1193  | 1.35 | MYO10      | myosin X, transcript variant X4                                                        |
| 103   | 139   | 1.35 | NIPA2      | NIPA magnesium transporter 2, transcript variant X10                                   |
| 241   | 325   | 1.35 | MFNG       | MFNG O-fucosylpeptide 3-beta-N-acetylglucosaminyltransferase, transcript variant 1     |
| 161   | 217   | 1.35 | VCAN       | versican, transcript variant 2                                                         |
| 299   | 403   | 1.35 | C4orf48    | chromosome 4 open reading frame 48, transcript variant X1                              |
| 259   | 349   | 1.35 | SLCO3A1    | solute carrier organic anion transporter family member 3A1, transcript variant X3      |
| 311   | 419   | 1.35 | BOLA2-SMG  | BOLA2-SMG1P6 readthrough, transcript variant 4                                         |
| 446   | 599   | 1.34 | MREG       | melanoregulin                                                                          |
| 16197 | 21720 | 1.34 | CD44       | CD44 molecule (Indian blood group), transcript variant 5                               |
| 135   | 181   | 1.34 | TNFRSF11B  | TNF receptor superfamily member 11b                                                    |
| 165   | 221   | 1.34 | NDUFS1     | NADH:ubiquinone oxidoreductase core subunit S1, transcript variant 5                   |
| 186   | 249   | 1.34 | CLEC2D     | C-type lectin domain family 2 member D, transcript variant 5                           |
| 240   | 321   | 1.34 | EXOSC7     | exosome component 7, transcript variant X5                                             |
| 250   | 334   | 1.34 | APOO       | apolipoprotein O, transcript variant X3                                                |
| 859   | 1147  | 1.34 | ARRDC3     | arrestin domain containing 3, transcript variant 6                                     |
| 608   | 811   | 1.33 | TANK       | TRAF family member associated NFkB activator, transcript variant 2                     |
| 1928  | 2571  | 1.33 | GPR68      | G protein-coupled receptor 68, transcript variant X4                                   |
| 150   | 200   | 1.33 | NLE1       | notchless homolog 1, transcript variant 2                                              |
| 385   | 512   | 1.33 | LOC339192  | uncharacterized LOC339192                                                              |
| 1501  | 1996  | 1.33 | F3         | coagulation factor III, tissue factor, transcript variant 1                            |
| 11069 | 14714 | 1.33 | PPIF       | peptidylprolyl isomerase F, transcript variant X1                                      |
| 229   | 304   | 1.33 | COL27A1    | collagen type XXVII alpha 1 chain, transcript variant X4                               |
| 1289  | 1711  | 1.33 | RAP2C      | RAP2C, member of RAS oncogene family, transcript variant 4                             |
| 104   | 138   | 1.33 | MED27      | mediator complex subunit 27, transcript variant 3                                      |
| 169   | 224   | 1.33 | CYB561     | cytochrome b561, transcript variant 2                                                  |
| 121   | 160   | 1.32 | MIR3916    | hsa-miR-3916                                                                           |
| 188   | 248   | 1.32 | PLD2       | phospholipase D2, transcript variant X6                                                |
| 113   | 149   | 1.32 | TRIM16     | tripartite motif containing 16, transcript variant 3                                   |
| 289   | 381   | 1.32 | MRPS36     | mitochondrial ribosomal protein S36                                                    |
| 129   | 170   | 1.32 | TIFA       | TRAF interacting protein with forkhead associated domain                               |
| 1656  | 2181  | 1.32 | PRDM1      | PR/SET domain 1, transcript variant 1                                                  |
| 139   | 183   | 1.32 | USP31      | ubiquitin specific peptidase 31, transcript variant X5                                 |

|      |      |      |            |                                                                                                       |
|------|------|------|------------|-------------------------------------------------------------------------------------------------------|
| 709  | 931  | 1.31 | NEDD4L     | NEDD4 like E3 ubiquitin protein ligase, transcript variant X7                                         |
| 4495 | 5898 | 1.31 | EFHD2      | EF-hand domain family member D2                                                                       |
| 3198 | 4194 | 1.31 | MTHFD2     | methylenetetrahydrofolate dehydrogenase (NADP+ dependent) 2, methylenetetrahydrofolate cyclohydrolase |
| 257  | 337  | 1.31 | USP49      | ubiquitin specific peptidase 49, transcript variant 1                                                 |
| 119  | 156  | 1.31 | FCER2      | Fc fragment of IgE receptor II, transcript variant 2                                                  |
| 104  | 136  | 1.31 | RAB12      | RAB12, member RAS oncogene family, transcript variant X1                                              |
| 117  | 153  | 1.31 | BIK        | BCL2 interacting killer                                                                               |
| 800  | 1046 | 1.31 | CREBL2     | cAMP responsive element binding protein like 2                                                        |
| 361  | 472  | 1.31 | FAM49A     | family with sequence similarity 49 member A                                                           |
| 176  | 230  | 1.31 | RASA4B     | RAS p21 protein activator 4B, transcript variant X6                                                   |
| 111  | 145  | 1.31 | CBWD5      | COBW domain containing 5, transcript variant X13                                                      |
| 147  | 192  | 1.31 | LOC1027242 | neuroblastoma breakpoint family member 1, transcript variant X1                                       |
| 201  | 262  | 1.30 | PDIA5      | protein disulfide isomerase family A member 5, transcript variant 2                                   |
| 201  | 262  | 1.30 | RRAS2      | RAS related 2, transcript variant 1                                                                   |
| 1595 | 2079 | 1.30 | SMAD7      | SMAD family member 7, transcript variant 2                                                            |
| 350  | 456  | 1.30 | KLF3       | Kruppel like factor 3, transcript variant X2                                                          |
| 119  | 155  | 1.30 | SLC37A1    | solute carrier family 37 member 1, transcript variant X1                                              |
| 106  | 138  | 1.30 | SLC22A18   | solute carrier family 22 member 18, transcript variant 4                                              |
| 292  | 380  | 1.30 | HOPX       | HOP homeobox, transcript variant X8                                                                   |
| 156  | 203  | 1.30 | RPS2P12    |                                                                                                       |
| 143  | 186  | 1.30 | CLEC7A     | C-type lectin domain containing 7A, transcript variant 5                                              |
| 405  | 526  | 1.30 | AP2A2      | adaptor related protein complex 2 subunit alpha 2, transcript variant X2                              |
| 198  | 257  | 1.30 | TRNR       | tRNA-Arg                                                                                              |
| 212  | 275  | 1.30 | FEZ1       | fasciculation and elongation protein zeta 1, transcript variant X2                                    |
| 128  | 166  | 1.30 | FAM20C     | FAM20C golgi associated secretory pathway kinase                                                      |
| 145  | 188  | 1.30 | IRF1       | interferon regulatory factor 1, transcript variant 5                                                  |
| 172  | 223  | 1.30 | POLR2J3    | RNA polymerase II subunit J3                                                                          |
| 520  | 674  | 1.30 | C3orf80    | chromosome 3 open reading frame 80                                                                    |
| 142  | 184  | 1.30 | CYB5A      | cytochrome b5 type A, transcript variant X1                                                           |
