# Supplementary material for: Immunomodulatory effects of extracellular glyceraldehyde 3-phosphate dehydrogenase of exopolysaccharide-producing Lactiplantibacillus plantarum JCM 1149
Source: Royal Society of Chemistry journal article supplement (doi:10.1039/d2fo02927h), 2022-12-15
Supplement: d2fo02927h5.pdf [file d2fo02927h5.pdf]

Supplementary Table 3. Downregulated gene expressions in THP-1 DC by treatment with GAPDH

| PBS  | GAPDH | GAPDH/PBS | GENE         | Product                                                                                                                 |
|------|-------|-----------|--------------|-------------------------------------------------------------------------------------------------------------------------|
| 1893 | 160   | 0.08      | RPL7A        | ribosomal protein L7a                                                                                                   |
| 1031 | 105   | 0.10      | CYFIP1       | cytoplasmic FMR1 interacting protein 1, transcript variant 10                                                           |
| 1786 | 199   | 0.11      | RPS6KA1      | ribosomal protein S6 kinase A1, transcript variant 3                                                                    |
| 707  | 96    | 0.14      | HNRNPR       | heterogeneous nuclear ribonucleoprotein R, transcript variant 6                                                         |
| 1490 | 232   | 0.16      | SLC25A6      | solute carrier family 25 member 6                                                                                       |
| 1210 | 196   | 0.16      | SEMA7A       | semaphorin 7A (John Milton Hagen blood group), transcript variant 2                                                     |
| 652  | 108   | 0.17      | EIF5A        | eukaryotic translation initiation factor 5A, transcript variant A                                                       |
| 1339 | 231   | 0.17      | PSME2        | proteasome activator subunit 2, transcript variant X1                                                                   |
| 324  | 99    | 0.31      | INTS3        | integrator complex subunit 3, transcript variant 1                                                                      |
| 949  | 292   | 0.31      | CCL5         | C-C motif chemokine ligand 5, transcript variant 1                                                                      |
| 302  | 94    | 0.31      | PHF1         | PHD finger protein 1, transcript variant 3                                                                              |
| 1282 | 419   | 0.33      | MGAT4B       | alpha-1,3-mannosyl-glycoprotein 4-beta-N-acetylglucosaminyltransferase B, transcript variant 2                          |
| 262  | 97    | 0.37      | PIP4K2B      | phosphatidylinositol-5-phosphate 4-kinase type 2 beta                                                                   |
| 354  | 138   | 0.39      | IPO4         | importin 4, transcript variant 2                                                                                        |
| 1222 | 477   | 0.39      | PSMB3        | proteasome subunit beta 3, transcript variant 3                                                                         |
| 416  | 164   | 0.39      | CEP170       | centrosomal protein 170, transcript variant X12                                                                         |
| 597  | 236   | 0.40      | RNH1         | ribonuclease/angiogenin inhibitor 1, transcript variant 4                                                               |
| 280  | 116   | 0.41      | PTPRC        | protein tyrosine phosphatase receptor type C, transcript variant 1                                                      |
| 317  | 132   | 0.42      | HNRNPH1      | heterogeneous nuclear ribonucleoprotein H1, transcript variant 20                                                       |
| 315  | 142   | 0.45      | NCF4         | neutrophil cytosolic factor 4, transcript variant 2                                                                     |
| 672  | 313   | 0.47      | EIF3C        | eukaryotic translation initiation factor 3 subunit C, transcript variant 3                                              |
| 1252 | 599   | 0.48      | GPRIN3       | GPRIN family member 3, transcript variant X4                                                                            |
| 259  | 135   | 0.52      | GPR89A       | G protein-coupled receptor 89A, transcript variant X5                                                                   |
| 231  | 121   | 0.52      | RGS4         | regulator of G protein signaling 4, transcript variant 3                                                                |
| 217  | 116   | 0.53      | ADORA3       | adenosine A3 receptor, transcript variant A                                                                             |
| 512  | 277   | 0.54      | UBASH3B      | ubiquitin associated and SH3 domain containing B, transcript variant 2                                                  |
| 985  | 537   | 0.55      | NOMO1        | NODAL modulator 1                                                                                                       |
| 621  | 341   | 0.55      | RASA3        | RAS p21 protein activator 3, transcript variant 2                                                                       |
| 285  | 158   | 0.55      | CARS         | cysteinyI-tRNA synthetase, transcript variant 4                                                                         |
| 392  | 221   | 0.56      | TBC1D9B      | TBC1 domain family member 9B, transcript variant 2                                                                      |
| 157  | 89    | 0.57      | TCEA1P2      |                                                                                                                         |
| 1968 | 1118  | 0.57      | MERTK        | MER proto-oncogene, tyrosine kinase                                                                                     |
| 161  | 92    | 0.57      | EME1         | essential meiotic structure-specific endonuclease 1, transcript variant X2                                              |
| 213  | 123   | 0.58      | LOC107986031 | uncharacterized LOC107986031                                                                                            |
| 304  | 176   | 0.58      | NXPH3        | neurexophilin 3                                                                                                         |
| 314  | 184   | 0.59      | ITGA2        | integrin subunit alpha 2, transcript variant 3                                                                          |
| 179  | 105   | 0.59      | KIAA0754     | KIAA0754                                                                                                                |
| 242  | 142   | 0.59      | LRRC25       | leucine rich repeat containing 25, transcript variant X2                                                                |
| 230  | 135   | 0.59      | CRIPAK       | cysteine rich PAK1 inhibitor                                                                                            |
| 307  | 181   | 0.59      | B3GALNT2     | beta-1,3-N-acetylgalactosaminyltransferase 2, transcript variant 1                                                      |
| 430  | 254   | 0.59      | NUP160       | nucleoporin 160, transcript variant 1                                                                                   |
| 316  | 187   | 0.59      | RTN4R        | reticulin 4 receptor                                                                                                    |
| 299  | 177   | 0.59      | SMARCB1      | SWI/SNF related, matrix associated, actin dependent regulator of chromatin, subfamily b, member 1, transcript variant 4 |
| 589  | 349   | 0.59      | CLPTM1L      | CLPTM1 like, transcript variant X5                                                                                      |
| 241  | 143   | 0.59      | HMCN1        | hemicentin 1, transcript variant X2                                                                                     |
| 178  | 106   | 0.60      | CDC47        | cell division cycle associated 7, transcript variant 1                                                                  |
| 441  | 263   | 0.60      | SOC56        | suppressor of cytokine signaling 6, transcript variant X1                                                               |
| 356  | 213   | 0.60      | GAREM1       | GRB2 associated regulator of MAPK1 subtype 1, transcript variant X3                                                     |
| 270  | 162   | 0.60      | GRAMD1B      | GRAM domain containing 1B, transcript variant 7                                                                         |
| 1098 | 662   | 0.60      | PGDB5        | piggyBac transposable element derived 5                                                                                 |
| 233  | 141   | 0.61      | RHOBTB1      | Rho related BTB domain containing 1, transcript variant 11                                                              |
| 331  | 201   | 0.61      | ABHD10       | abhydrolase domain containing 10, transcript variant 2                                                                  |
| 1146 | 696   | 0.61      | EFR3B        | EFR3 homolog B, transcript variant 1                                                                                    |
| 271  | 165   | 0.61      | CDK5R1       | cyclin dependent kinase 5 regulatory subunit 1, transcript variant X2                                                   |
| 228  | 139   | 0.61      | GALM         | galactose mutarotase                                                                                                    |
| 336  | 205   | 0.61      | THSD7A       | thrombospondin type 1 domain containing 7A, transcript variant X4                                                       |
| 216  | 132   | 0.61      | LPAR5        | lysophosphatidic acid receptor 5, transcript variant 1                                                                  |
| 162  | 99    | 0.61      | TAL1         | TAL bHLH transcription factor 1, erythroid differentiation factor, transcript variant X3                                |
| 1412 | 864   | 0.61      | CCR1         | C-C motif chemokine receptor 1                                                                                          |
| 165  | 101   | 0.61      | MTHFD2L      | methylenetetrahydrofolate dehydrogenase (NADP+ dependent) 2 like, transcript variant 7                                  |
| 165  | 101   | 0.61      | HHEX         | hematopoietically expressed homeobox                                                                                    |
| 1493 | 919   | 0.62      | CNIH3        | cornichon family AMPA receptor auxiliary protein 3, transcript variant 12                                               |
| 214  | 132   | 0.62      | CORO2A       | coronin 2A, transcript variant 2                                                                                        |
| 1366 | 844   | 0.62      | DDIT4L       | DNA damage inducible transcript 4 like                                                                                  |
| 226  | 140   | 0.62      | HYOU1        | hypoxia up-regulated 1, transcript variant X8                                                                           |
| 208  | 129   | 0.62      | ST8SIA5      | ST8 alpha-N-acetyl-neuraminidase alpha-2,8-sialyltransferase 5, transcript variant X1                                   |
| 158  | 98    | 0.62      | HDAC6        | histone deacetylase 6, transcript variant 10                                                                            |
| 3219 | 2006  | 0.62      | CANX         | calnexin, transcript variant 3                                                                                          |
| 144  | 90    | 0.63      | LAIR1        | leukocyte associated immunoglobulin like receptor 1, transcript variant c                                               |
| 172  | 108   | 0.63      | PCDH1        | protocadherin 1, transcript variant 1                                                                                   |
| 172  | 108   | 0.63      | ZNF652       | zinc finger protein 652, transcript variant 2                                                                           |
| 417  | 262   | 0.63      | STARD13      | StAR related lipid transfer domain containing 13, transcript variant 4                                                  |
| 183  | 115   | 0.63      | EPN2         | epsin 2, transcript variant 2                                                                                           |
| 895  | 564   | 0.63      | ARID5B       | AT-rich interaction domain 5B, transcript variant X3                                                                    |
| 222  | 140   | 0.63      | SASH3        | SAM and SH3 domain containing 3, transcript variant X1                                                                  |
| 751  | 474   | 0.63      | ETV5         | ETS variant 5                                                                                                           |

|      |      |      |              |                                                                                         |
|------|------|------|--------------|-----------------------------------------------------------------------------------------|
| 197  | 125  | 0.63 | MX2          | MX dynamin like GTPase 2, transcript variant X1                                         |
| 160  | 102  | 0.64 | RAD51C       | RAD51 paralog C, transcript variant 4                                                   |
| 229  | 146  | 0.64 | GPR65        | G protein-coupled receptor 65                                                           |
| 202  | 129  | 0.64 | LGR4         | leucine rich repeat containing G protein-coupled receptor 4, transcript variant 1       |
| 2632 | 1683 | 0.64 | SPRED1       | sprouty related EVH1 domain containing 1, transcript variant X2                         |
| 167  | 107  | 0.64 | ZNF347       | zinc finger protein 347, transcript variant 3                                           |
| 2197 | 1408 | 0.64 | TNFRSF21     | TNF receptor superfamily member 21, transcript variant X1                               |
| 424  | 272  | 0.64 | ZNF395       | zinc finger protein 395                                                                 |
| 835  | 536  | 0.64 | TLR4         | toll like receptor 4, transcript variant 3                                              |
| 782  | 502  | 0.64 | MTUS1        | microtubule associated scaffold protein 1, transcript variant 6                         |
| 235  | 151  | 0.64 | SLAMF6       | SLAM family member 6, transcript variant 4                                              |
| 272  | 175  | 0.64 | SCRN1        | secernin 1, transcript variant 1                                                        |
| 347  | 224  | 0.65 | GCNT1        | glucosaminyl (N-acetyl) transferase 1, transcript variant 3                             |
| 212  | 137  | 0.65 | ANKRD63      | ankyrin repeat domain 63                                                                |
| 315  | 204  | 0.65 | STRIP2       | striatin interacting protein 2, transcript variant X1                                   |
| 137  | 89   | 0.65 | RTTN         | rotatin, transcript variant X8                                                          |
| 223  | 145  | 0.65 | CSGALNACT1   | chondroitin sulfate N-acetylgalactosaminyltransferase 1, transcript variant 21          |
| 1102 | 717  | 0.65 | SUCNR1       | succinate receptor 1                                                                    |
| 146  | 95   | 0.65 | CLIC1        | chloride intracellular channel 1, transcript variant 1                                  |
| 175  | 114  | 0.65 | SCAI         | suppressor of cancer cell invasion, transcript variant 2                                |
| 135  | 88   | 0.65 | LRATD2       | LRAT domain containing 2, transcript variant 1                                          |
| 147  | 96   | 0.65 | SH3RF2       | SH3 domain containing ring finger 2, transcript variant X3                              |
| 228  | 149  | 0.65 | SYNE1        | spectrin repeat containing nuclear envelope protein 1, transcript variant 3             |
| 179  | 117  | 0.65 | DACT1        | dishevelled binding antagonist of beta catenin 1, transcript variant 1                  |
| 324  | 212  | 0.65 | BRCA2        | BRCA2 DNA repair associated                                                             |
| 394  | 258  | 0.65 | NRSN1        | neurensin 1                                                                             |
| 1599 | 1049 | 0.66 | TLE3         | TLE family member 3, transcriptional corepressor, transcript variant X12                |
| 446  | 293  | 0.66 | TLR6         | toll like receptor 6                                                                    |
| 516  | 339  | 0.66 | LOC101928429 | uncharacterized LOC101928429                                                            |
| 140  | 92   | 0.66 | SLC35E4      | solute carrier family 35 member E4, transcript variant X1                               |
| 246  | 162  | 0.66 | ARFGEF3      | ARFGEF family member 3                                                                  |
| 205  | 135  | 0.66 | ZC3H6        | zinc finger CCCH-type containing 6, transcript variant X1                               |
| 1023 | 674  | 0.66 | KCNJ2        | potassium voltage-gated channel subfamily J member 2                                    |
| 3343 | 2203 | 0.66 | CNR1         | cannabinoid receptor 1, transcript variant 7                                            |
| 229  | 151  | 0.66 | CHST14       | carbohydrate sulfotransferase 14                                                        |
| 194  | 128  | 0.66 | DLG3         | discs large MAGUK scaffold protein 3, transcript variant X5                             |
| 145  | 96   | 0.66 | MAP7         | microtubule associated protein 7, transcript variant 7                                  |
| 634  | 420  | 0.66 | EOMES        | eomesodermin, transcript variant X1                                                     |
| 169  | 112  | 0.66 | PTPRO        | protein tyrosine phosphatase receptor type O, transcript variant 2                      |
| 286  | 190  | 0.66 | CUX2         | cut like homeobox 2, transcript variant X1                                              |
| 1037 | 689  | 0.66 | CDCP1        | CUB domain containing protein 1, transcript variant X3                                  |
| 465  | 309  | 0.66 | P2RY1        | purinergic receptor P2Y1                                                                |
| 399  | 266  | 0.67 | TRANK1       | tetratricopeptide repeat and ankyrin repeat containing 1, transcript variant X1         |
| 168  | 112  | 0.67 | MBOAT1       | membrane bound O-acyltransferase domain containing 1, transcript variant X1             |
| 138  | 92   | 0.67 | SPECC1       | sperm antigen with calponin homology and coiled-coil domains 1, transcript variant X1   |
| 331  | 221  | 0.67 | ORC1         | origin recognition complex subunit 1, transcript variant 2                              |
| 834  | 557  | 0.67 | IGFN1        | immunoglobulin like and fibronectin type III domain containing 1, transcript variant X6 |
| 247  | 165  | 0.67 | TRIB2        | tribbles pseudokinase 2, transcript variant 1                                           |
| 136  | 91   | 0.67 | TMEM117      | transmembrane protein 117, transcript variant X4                                        |
| 576  | 386  | 0.67 | ARHGAP12     | Rho GTPase activating protein 12, transcript variant 4                                  |
| 664  | 445  | 0.67 | SNTB2        | syntrophin beta 2                                                                       |
| 134  | 90   | 0.67 | ITGAE        | integrin subunit alpha E, transcript variant X6                                         |
| 3545 | 2384 | 0.67 | ZNF281       | zinc finger protein 281, transcript variant 2                                           |
| 342  | 230  | 0.67 | ARMC10       | armadillo repeat containing 10, transcript variant A                                    |
| 1382 | 930  | 0.67 | IFI16        | interferon gamma inducible protein 16, transcript variant X3                            |
| 805  | 543  | 0.67 | DAAM1        | dishevelled associated activator of morphogenesis 1, transcript variant X2              |
| 375  | 253  | 0.67 | EIF3CL       | eukaryotic translation initiation factor 3 subunit C like, transcript variant 1         |
| 231  | 156  | 0.68 | ZNF521       | zinc finger protein 521, transcript variant X7                                          |
| 268  | 181  | 0.68 | TNRC6C-AS1   | TNRC6C antisense RNA 1                                                                  |
| 2560 | 1729 | 0.68 | TRIM2        | tripartite motif containing 2, transcript variant X4                                    |
| 139  | 94   | 0.68 | LOC100049716 | uncharacterized LOC100049716                                                            |
| 275  | 186  | 0.68 | USP18        | ubiquitin specific peptidase 18                                                         |
| 272  | 184  | 0.68 | PLEKHG4      | pleckstrin homology and RhoGEF domain containing G4, transcript variant 3               |
| 668  | 452  | 0.68 | MAN1C1       | mannosidase alpha class 1C member 1, transcript variant X2                              |
| 390  | 264  | 0.68 | PPP1R14C     | protein phosphatase 1 regulatory inhibitor subunit 14C                                  |
| 647  | 438  | 0.68 | ZNF469       | zinc finger protein 469, transcript variant X2                                          |
| 589  | 399  | 0.68 | FZD1         | frizzled class receptor 1                                                               |
| 208  | 141  | 0.68 | FANCF        | FA complementation group F                                                              |
| 823  | 558  | 0.68 | FUT8         | fucosyltransferase 8, transcript variant 5                                              |
| 348  | 236  | 0.68 | TREML1       | triggering receptor expressed on myeloid cells like 1, transcript variant 2             |
| 647  | 439  | 0.68 | SNX30        | sorting nexin family member 30                                                          |
| 175  | 119  | 0.68 | MNAT1        | MNAT1 component of CDK activating kinase, transcript variant X6                         |
| 1319 | 897  | 0.68 | RHOBTB2      | Rho related BTB domain containing 2, transcript variant 2                               |
| 269  | 183  | 0.68 | NHLRC3       | NHL repeat containing 3, transcript variant 2                                           |
| 379  | 258  | 0.68 | ABHD15       | abhydrolase domain containing 15                                                        |
| 596  | 406  | 0.68 | LHFPL2       | LHFPL tetraspan subfamily member 2, transcript variant X6                               |
| 778  | 530  | 0.68 | PODXL        | podocalyxin like, transcript variant 2                                                  |
| 135  | 92   | 0.68 | RABL2A       | RAB, member of RAS oncogene family like 2A, transcript variant X24                      |
| 135  | 92   | 0.68 | FBXO4        | F-box protein 4, transcript variant 2                                                   |

|      |      |      |              |                                                                                       |
|------|------|------|--------------|---------------------------------------------------------------------------------------|
| 428  | 292  | 0.68 | FANCE        | FA complementation group E, transcript variant X6                                     |
| 490  | 335  | 0.68 | CD300A       | CD300a molecule, transcript variant X1                                                |
| 174  | 119  | 0.68 | HTRA3        | Htra serine peptidase 3, transcript variant 1                                         |
| 212  | 145  | 0.68 | TMEM246      | transmembrane protein 246, transcript variant 3                                       |
| 266  | 182  | 0.68 | ZNF618       | zinc finger protein 618, transcript variant 1                                         |
| 3066 | 2102 | 0.69 | TRERF1       | transcriptional regulating factor 1, transcript variant X27                           |
| 175  | 120  | 0.69 | SHROOM2      | shroom family member 2, transcript variant X2                                         |
| 172  | 118  | 0.69 | LOC102724985 | pyridoxal-dependent decarboxylase domain-containing protein 1, transcript variant X16 |
| 1759 | 1208 | 0.69 | TMEM87B      | transmembrane protein 87B, transcript variant X3                                      |
| 179  | 123  | 0.69 | NNT-AS1      | NNT antisense RNA 1                                                                   |
| 1314 | 903  | 0.69 | OSBPL3       | oxysterol binding protein like 3, transcript variant 6                                |
| 414  | 285  | 0.69 | ANKMY2       | ankyrin repeat and MYND domain containing 2                                           |
| 138  | 95   | 0.69 | GPR88        | G protein-coupled receptor 88                                                         |
| 2834 | 1951 | 0.69 | CHD9         | chromodomain helicase DNA binding protein 9, transcript variant 4                     |
| 3010 | 2073 | 0.69 | LBR          | lamin B receptor, transcript variant X3                                               |
| 151  | 104  | 0.69 | NRSN2-AS1    | NRSN2 antisense RNA 1                                                                 |
| 254  | 175  | 0.69 | FAM8A1       | family with sequence similarity 8 member A1                                           |
| 677  | 467  | 0.69 | ATP10D       | ATPase phospholipid transporting 10D (putative)                                       |
| 158  | 109  | 0.69 | GBP3         | guanylate binding protein 3, transcript variant X6                                    |
| 171  | 118  | 0.69 | FNBP1L       | formin binding protein 1 like, transcript variant X3                                  |
| 349  | 241  | 0.69 | SRGAP1       | SLIT-ROBO Rho GTPase activating protein 1, transcript variant X2                      |
| 149  | 103  | 0.69 | LOC101928716 | uncharacterized LOC101928716                                                          |
| 175  | 121  | 0.69 | NR2F1        | nuclear receptor subfamily 2 group F member 1, transcript variant X1                  |
| 558  | 386  | 0.69 | PIAS2        | protein inhibitor of activated STAT 2, transcript variant 4                           |
| 130  | 90   | 0.69 | AK9          | adenylate kinase 9, transcript variant X12                                            |
| 244  | 169  | 0.69 | DNA2         | DNA replication helicase/nuclease 2, transcript variant X3                            |
| 153  | 106  | 0.69 | CD1C         | CD1c molecule, transcript variant X1                                                  |
| 140  | 97   | 0.69 | C2orf68      | chromosome 2 open reading frame 68, transcript variant X2                             |
| 674  | 467  | 0.69 | TRAJ23       |                                                                                       |
| 824  | 571  | 0.69 | RGS14        | regulator of G protein signaling 14, transcript variant X1                            |
| 251  | 174  | 0.69 | PRIM1        | DNA primase subunit 1                                                                 |
| 196  | 136  | 0.69 | HRH2         | histamine receptor H2, transcript variant X5                                          |
| 576  | 400  | 0.69 | LOC112268437 | uncharacterized protein FLJ45252                                                      |
| 596  | 414  | 0.69 | RIN1         | Ras and Rab interactor 1, transcript variant 2                                        |
| 692  | 481  | 0.70 | TRPS1        | transcriptional repressor GATA binding 1, transcript variant 2                        |
| 1029 | 716  | 0.70 | ZMYM3        | zinc finger MYM-type containing 3, transcript variant 1                               |
| 171  | 119  | 0.70 | TBC1D16      | TBC1 domain family member 16, transcript variant 4                                    |
| 303  | 211  | 0.70 | LRRC4        | leucine rich repeat containing 4, transcript variant X1                               |
| 478  | 333  | 0.70 | PIGC         | phosphatidylinositol glycan anchor biosynthesis class C, transcript variant 1         |
| 317  | 221  | 0.70 | CDC45        | cell division cycle 45, transcript variant 4                                          |
| 172  | 120  | 0.70 | ARHGAP6      | Rho GTPase activating protein 6, transcript variant 6                                 |
| 225  | 157  | 0.70 | ENDOD1       | endonuclease domain containing 1                                                      |
| 159  | 111  | 0.70 | SPTBN5       | spectrin beta, non-erythrocytic 5, transcript variant X5                              |
| 368  | 257  | 0.70 | SRGAP2C      | SLIT-ROBO Rho GTPase activating protein 2C, transcript variant 1                      |
| 199  | 139  | 0.70 | MTBP         | MDM2 binding protein                                                                  |
| 133  | 93   | 0.70 | TRIM32       | tripartite motif containing 32, transcript variant 1                                  |
| 476  | 333  | 0.70 | MVB12B       | multivesicular body subunit 12B, transcript variant 1                                 |
| 996  | 697  | 0.70 | MAF          | MAF bZIP transcription factor, transcript variant X2                                  |
| 220  | 154  | 0.70 | KIF13A       | kinesin family member 13A, transcript variant 4                                       |
| 1309 | 917  | 0.70 | TNS1         | tensin 1, transcript variant X18                                                      |
| 3323 | 2328 | 0.70 | LBH          | LBH regulator of WNT signaling pathway                                                |
| 157  | 110  | 0.70 | NEK10        | NIMA related kinase 10, transcript variant X24                                        |
| 979  | 686  | 0.70 | SESN1        | sestrin 1, transcript variant 1                                                       |
| 508  | 356  | 0.70 | LPCAT4       | lysophosphatidylcholine acyltransferase 4, transcript variant X5                      |
| 448  | 314  | 0.70 | ATP7A        | ATPase copper transporting alpha, transcript variant 2                                |
| 3401 | 2384 | 0.70 | EVI2B        | ecotropic viral integration site 2B                                                   |
| 950  | 666  | 0.70 | NRIP1        | nuclear receptor interacting protein 1                                                |
| 134  | 94   | 0.70 | ZNF44        | zinc finger protein 44, transcript variant X3                                         |
| 3673 | 2580 | 0.70 | JMJD1C       | jumonji domain containing 1C, transcript variant X10                                  |
| 387  | 272  | 0.70 | SYT7         | synaptotagmin 7, transcript variant 3                                                 |
| 303  | 213  | 0.70 | ZNF616       | zinc finger protein 616, transcript variant 2                                         |
| 1155 | 812  | 0.70 | ADRA2B       | adrenoceptor alpha 2B                                                                 |
| 165  | 116  | 0.70 | TICRR        | TOPBP1 interacting checkpoint and replication regulator, transcript variant 2         |
| 182  | 128  | 0.70 | MRTFB        | myocardin related transcription factor B, transcript variant 8                        |
| 429  | 302  | 0.70 | FAM217B      | family with sequence similarity 217 member B, transcript variant X1                   |
| 625  | 440  | 0.70 | IRS1         | insulin receptor substrate 1                                                          |
| 169  | 119  | 0.70 | NXPH4        | neurexophilin 4, transcript variant X1                                                |
| 1126 | 793  | 0.70 | TMEM215      | transmembrane protein 215                                                             |
| 3064 | 2158 | 0.70 | DOP1B        | DOP1 leucine zipper like protein B, transcript variant X2                             |
| 944  | 665  | 0.70 | SH3RF1       | SH3 domain containing ring finger 1                                                   |
| 342  | 241  | 0.70 | ABHD6        | abhydrolase domain containing 6, transcript variant 1                                 |
| 3104 | 2188 | 0.70 | ARHGAP18     | Rho GTPase activating protein 18                                                      |
| 854  | 602  | 0.70 | TNRC6B       | trinucleotide repeat containing adaptor 6B, transcript variant 1                      |
| 2444 | 1724 | 0.71 | STK38L       | serine/threonine kinase 38 like, transcript variant X13                               |
| 2938 | 2073 | 0.71 | SLC30A1      | solute carrier family 30 member 1                                                     |
| 214  | 151  | 0.71 | ALAD         | aminolevulinatase dehydratase, transcript variant X3                                  |
| 401  | 283  | 0.71 | PHF3         | PHD finger protein 3, transcript variant 3                                            |
| 255  | 180  | 0.71 | VARS         | valyl-tRNA synthetase, transcript variant X2                                          |
| 201  | 142  | 0.71 | ZNF708       | zinc finger protein 708, transcript variant X3                                        |

|      |      |      |              |                                                                                                |
|------|------|------|--------------|------------------------------------------------------------------------------------------------|
| 2380 | 1682 | 0.71 | KCTD12       | potassium channel tetramerization domain containing 12                                         |
| 788  | 557  | 0.71 | DTL          | denticleless E3 ubiquitin protein ligase homolog, transcript variant 3                         |
| 660  | 467  | 0.71 | VANGL1       | VANGL planar cell polarity protein 1, transcript variant 2                                     |
| 130  | 92   | 0.71 | RAB3IL1      | RAB3A interacting protein like 1, transcript variant X6                                        |
| 363  | 257  | 0.71 | B3GNT5       | UDP-GlcNAc:betaGal beta-1,3-N-acetylglucosaminyltransferase 5, transcript variant X4           |
| 209  | 148  | 0.71 | ZBTB42       | zinc finger and BTB domain containing 42, transcript variant 2                                 |
| 329  | 233  | 0.71 | ALMS1        | ALMS1 centrosome and basal body associated protein                                             |
| 638  | 452  | 0.71 | DENN5B       | DENN domain containing 5B, transcript variant 1                                                |
| 151  | 107  | 0.71 | EML1         | EMAP like 1, transcript variant X2                                                             |
| 261  | 185  | 0.71 | ANKRD28      | ankyrin repeat domain 28, transcript variant 12                                                |
| 862  | 611  | 0.71 | RERE         | arginine-glutamic acid dipeptide repeats, transcript variant 2                                 |
| 237  | 168  | 0.71 | GPT2         | glutamic--pyruvic transaminase 2, transcript variant X1                                        |
| 292  | 207  | 0.71 | LINC00941    | long intergenic non-protein coding RNA 941                                                     |
| 485  | 344  | 0.71 | FLRT2        | fibronectin leucine rich transmembrane protein 2, transcript variant X1                        |
| 217  | 154  | 0.71 | TTBK2        | tau tubulin kinase 2, transcript variant X1                                                    |
| 124  | 88   | 0.71 | VIPR1        | vasoactive intestinal peptide receptor 1, transcript variant X3                                |
| 1967 | 1396 | 0.71 | TRAM2        | translocation associated membrane protein 2, transcript variant X1                             |
| 1941 | 1378 | 0.71 | SFMBT2       | Scm like with four mbt domains 2, transcript variant X1                                        |
| 322  | 229  | 0.71 | TTK          | TTK protein kinase, transcript variant X1                                                      |
| 587  | 418  | 0.71 | C11orf45     | chromosome 11 open reading frame 45, transcript variant 4                                      |
| 425  | 303  | 0.71 | B4GALNT3     | beta-1,4-N-acetyl-galactosaminyltransferase 3                                                  |
| 324  | 231  | 0.71 | PPM1E        | protein phosphatase, Mg2+/Mn2+ dependent 1E, transcript variant 2                              |
| 1014 | 723  | 0.71 | PRR12        | proline rich 12                                                                                |
| 638  | 455  | 0.71 | RNF168       | ring finger protein 168                                                                        |
| 279  | 199  | 0.71 | LOC145783    | uncharacterized LOC145783                                                                      |
| 565  | 403  | 0.71 | ZBTB37       | zinc finger and BTB domain containing 37, transcript variant X3                                |
| 628  | 448  | 0.71 | ADGRE4P      | adhesion G protein-coupled receptor E4, pseudogene                                             |
| 2070 | 1477 | 0.71 | SH3PXD2A     | SH3 and PX domains 2A, transcript variant 2                                                    |
| 199  | 142  | 0.71 | CCDC85B      | coiled-coil domain containing 85B                                                              |
| 255  | 182  | 0.71 | GIMAP6       | GTPase, IMAP family member 6, transcript variant 2                                             |
| 266  | 190  | 0.71 | SNRNP48      | small nuclear ribonucleoprotein U11/U12 subunit 48, transcript variant X1                      |
| 189  | 135  | 0.71 | NBPF1        | NBPF member 1                                                                                  |
| 147  | 105  | 0.71 | ZNF670       | zinc finger protein 670, transcript variant 2                                                  |
| 200  | 143  | 0.72 | AP5S1        | adaptor related protein complex 5 subunit sigma 1, transcript variant 2                        |
| 186  | 133  | 0.72 | GPC6         | glypican 6                                                                                     |
| 179  | 128  | 0.72 | IL12RB2      | interleukin 12 receptor subunit beta 2, transcript variant X8                                  |
| 446  | 319  | 0.72 | SLC16A7      | solute carrier family 16 member 7, transcript variant X1                                       |
| 295  | 211  | 0.72 | PRUNE1       | prune exopolyphosphatase 1, transcript variant 5                                               |
| 137  | 98   | 0.72 | SIRT5        | sirtuin 5, transcript variant 3                                                                |
| 123  | 88   | 0.72 | FAM76A       | family with sequence similarity 76 member A, transcript variant X1                             |
| 5923 | 4238 | 0.72 | PLEKHA2      | pleckstrin homology domain containing A2                                                       |
| 457  | 327  | 0.72 | TLR1         | toll like receptor 1                                                                           |
| 225  | 161  | 0.72 | LDLRAD4      | low density lipoprotein receptor class A domain containing 4, transcript variant X27           |
| 218  | 156  | 0.72 | XKR8         | XK related 8                                                                                   |
| 211  | 151  | 0.72 | VSIG4        | V-set and immunoglobulin domain containing 4, transcript variant 2                             |
| 190  | 136  | 0.72 | GDPGP1       | GDP-D-glucose phosphorylase 1, transcript variant 1                                            |
| 148  | 106  | 0.72 | UBA6-AS1     | UBA6 antisense RNA 1 (head to head)                                                            |
| 1008 | 722  | 0.72 | CCSAP        | centriole, cilia and spindle associated protein, transcript variant X2                         |
| 141  | 101  | 0.72 | SULT1A1      | sulfotransferase family 1A member 1, transcript variant X14                                    |
| 173  | 124  | 0.72 | LOC100130992 | uncharacterized LOC100130992                                                                   |
| 456  | 327  | 0.72 | RSC1A1       | regulator of solute carriers 1                                                                 |
| 145  | 104  | 0.72 | BARD1        | BRCA1 associated RING domain 1, transcript variant X3                                          |
| 283  | 203  | 0.72 | KIF14        | kinesin family member 14, transcript variant X8                                                |
| 1494 | 1072 | 0.72 | STARD8       | StAR related lipid transfer domain containing 8, transcript variant 1                          |
| 3651 | 2621 | 0.72 | HAVCR2       | hepatitis A virus cellular receptor 2                                                          |
| 351  | 252  | 0.72 | FLJ32255     | uncharacterized LOC643977                                                                      |
| 142  | 102  | 0.72 | C19orf44     | chromosome 19 open reading frame 44, transcript variant X4                                     |
| 1492 | 1072 | 0.72 | RAP2B        | RAP2B, member of RAS oncogene family                                                           |
| 167  | 120  | 0.72 | TCAIM        | T cell activation inhibitor, mitochondrial, transcript variant 2                               |
| 178  | 128  | 0.72 | ARMCX5       | armadillo repeat containing X-linked 5, transcript variant 1                                   |
| 406  | 292  | 0.72 | MAP3K1       | mitogen-activated protein kinase kinase kinase 1                                               |
| 171  | 123  | 0.72 | DDAH1        | dimethylarginine dimethylaminohydrolase 1, transcript variant 1                                |
| 253  | 182  | 0.72 | ZYG11B       | zyg-11 family member B, cell cycle regulator, transcript variant X2                            |
| 214  | 154  | 0.72 | ILDR2        | immunoglobulin like domain containing receptor 2, transcript variant X3                        |
| 132  | 95   | 0.72 | PEX3         | peroxisomal biogenesis factor 3                                                                |
| 157  | 113  | 0.72 | PXMP4        | peroxisomal membrane protein 4, transcript variant 2                                           |
| 639  | 460  | 0.72 | EEPD1        | endonuclease/exonuclease/phosphatase family domain containing 1                                |
| 547  | 394  | 0.72 | LRMP         | lymphoid restricted membrane protein, transcript variant 2                                     |
| 665  | 479  | 0.72 | TRIM58       | tripartite motif containing 58                                                                 |
| 1600 | 1154 | 0.72 | MGAT4A       | alpha-1,3-mannosyl-glycoprotein 4-beta-N-acetylglucosaminyltransferase A, transcript variant 1 |
| 244  | 176  | 0.72 | RNF125       | ring finger protein 125                                                                        |
| 122  | 88   | 0.72 | LOC105374809 | uncharacterized LOC105374809, transcript variant X2                                            |
| 291  | 210  | 0.72 | SGIP1        | SH3 domain GRB2 like endophilin interacting protein 1, transcript variant X46                  |
| 324  | 234  | 0.72 | FAM111B      | family with sequence similarity 111 member B, transcript variant 3                             |
| 144  | 104  | 0.72 | RAPGEFL1     | Rap guanine nucleotide exchange factor like 1, transcript variant X3                           |
| 126  | 91   | 0.72 | NUDT17       | nudix hydrolase 17, transcript variant X2                                                      |
| 126  | 91   | 0.72 | AIG1         | androgen induced 1, transcript variant 11                                                      |
| 209  | 151  | 0.72 | CCDC189      | coiled-coil domain containing 189, transcript variant X19                                      |
| 137  | 99   | 0.72 | LOC102723817 | uncharacterized LOC102723817, transcript variant X2                                            |

|      |      |      |               |                                                                                               |
|------|------|------|---------------|-----------------------------------------------------------------------------------------------|
| 375  | 271  | 0.72 | PDK3          | pyruvate dehydrogenase kinase 3, transcript variant 1                                         |
| 202  | 146  | 0.72 | POMGN2        | protein O-linked mannose N-acetylglucosaminyltransferase 2 (beta 1,4-), transcript variant X2 |
| 202  | 146  | 0.72 | KIF24         | kinesin family member 24, transcript variant X6                                               |
| 130  | 94   | 0.72 | TBX18         | T-box transcription factor 18, transcript variant X4                                          |
| 130  | 94   | 0.72 | ACCS          | 1-aminocyclopropane-1-carboxylate synthase homolog (inactive), transcript variant X21         |
| 271  | 196  | 0.72 | ATP2B2        | ATPase plasma membrane Ca2+ transporting 2, transcript variant X12                            |
| 188  | 136  | 0.72 | LOC101927727  | uncharacterized LOC101927727                                                                  |
| 322  | 233  | 0.72 | DIPK2A        | divergent protein kinase domain 2A, transcript variant X1                                     |
| 275  | 199  | 0.72 | RBM43         | RNA binding motif protein 43                                                                  |
| 152  | 110  | 0.72 | CCDC51        | coiled-coil domain containing 51, transcript variant 5                                        |
| 858  | 621  | 0.72 | EFNB1         | ephrin B1                                                                                     |
| 286  | 207  | 0.72 | ITPRID2       | ITPR interacting domain containing 2, transcript variant 5                                    |
| 134  | 97   | 0.72 | ABRAXAS1      | abraxas 1, BRCA1 A complex subunit, transcript variant X1                                     |
| 2920 | 2114 | 0.72 | TENT5A        | terminal nucleotidyltransferase 5A                                                            |
| 982  | 711  | 0.72 | SPTLC2        | serine palmitoyltransferase long chain base subunit 2                                         |
| 145  | 105  | 0.72 | SH3D19        | SH3 domain containing 19, transcript variant 3                                                |
| 127  | 92   | 0.72 | ARHGAP19-SLIT | ARHGAP19-SLIT1 readthrough (NMD candidate)                                                    |
| 225  | 163  | 0.72 | TP73          | tumor protein p73, transcript variant 12                                                      |
| 236  | 171  | 0.72 | SUOX          | sulfite oxidase, transcript variant X3                                                        |
| 149  | 108  | 0.72 | PARP3         | poly(ADP-ribose) polymerase family member 3, transcript variant X2                            |
| 149  | 108  | 0.72 | CDC20P1       |                                                                                               |
| 229  | 166  | 0.72 | CD2AP         | CD2 associated protein, transcript variant X3                                                 |
| 488  | 354  | 0.73 | SAMD9         | sterile alpha motif domain containing 9, transcript variant 2                                 |
| 569  | 413  | 0.73 | PPP1R13B      | protein phosphatase 1 regulatory subunit 13B                                                  |
| 157  | 114  | 0.73 | KIF18A        | kinesin family member 18A, transcript variant X1                                              |
| 807  | 586  | 0.73 | SATB1         | SATB homeobox 1, transcript variant X3                                                        |
| 3211 | 2332 | 0.73 | TSPAN14       | tetraspanin 14, transcript variant 4                                                          |
| 179  | 130  | 0.73 | DMAC2L        | distal membrane arm assembly complex 2 like, transcript variant 2                             |
| 757  | 550  | 0.73 | ZBTB47        | zinc finger and BTB domain containing 47                                                      |
| 355  | 258  | 0.73 | ADCY7         | adenylate cyclase 7, transcript variant X12                                                   |
| 363  | 264  | 0.73 | SESN3         | sestrin 3, transcript variant 2                                                               |
| 154  | 112  | 0.73 | LOC107984282  | uncharacterized LOC107984282                                                                  |
| 121  | 88   | 0.73 | FYB1          | FYN binding protein 1, transcript variant X8                                                  |
| 224  | 163  | 0.73 | SOX13         | SRY-box 13, transcript variant X1                                                             |
| 911  | 663  | 0.73 | RUNX2         | RUNX family transcription factor 2, transcript variant 7                                      |
| 599  | 436  | 0.73 | PIK3CG        | phosphatidylinositol-4,5-bisphosphate 3-kinase catalytic subunit gamma, transcript variant X3 |
| 147  | 107  | 0.73 | CCDC183-AS1   | CCDC183 antisense RNA 1                                                                       |
| 239  | 174  | 0.73 | NICN1         | nicolin 1                                                                                     |
| 162  | 118  | 0.73 | FAN1          | FANCD2 and FANCI associated nuclease 1, transcript variant X5                                 |
| 188  | 137  | 0.73 | TTC28         | tetratricopeptide repeat domain 28, transcript variant X6                                     |
| 306  | 223  | 0.73 | TREX1         | three prime repair exonuclease 1, transcript variant 4                                        |
| 472  | 344  | 0.73 | DHRS3         | dehydrogenase/reductase 3, transcript variant 2                                               |
| 631  | 460  | 0.73 | WIPF3         | WAS/WASL interacting protein family member 3                                                  |
| 414  | 302  | 0.73 | CDON          | cell adhesion associated, oncogene regulated, transcript variant X7                           |
| 159  | 116  | 0.73 | SLCO4C1       | solute carrier organic anion transporter family member 4C1, transcript variant X2             |
| 159  | 116  | 0.73 | LINC02246     | long intergenic non-protein coding RNA 2246                                                   |
| 2779 | 2028 | 0.73 | NFATC3        | nuclear factor of activated T cells 3, transcript variant 2                                   |
| 285  | 208  | 0.73 | NIPBL-DT      | NIPBL divergent transcript                                                                    |
| 1958 | 1429 | 0.73 | TGFBR2        | transforming growth factor beta receptor 2, transcript variant 1                              |
| 585  | 427  | 0.73 | ZNF92         | zinc finger protein 92, transcript variant 3                                                  |
| 137  | 100  | 0.73 | SGMS2         | sphingomyelin synthase 2, transcript variant X7                                               |
| 648  | 473  | 0.73 | NLR3          | NLR family CARD domain containing 3, transcript variant X17                                   |
| 1211 | 884  | 0.73 | GPAT3         | glycerol-3-phosphate acyltransferase 3, transcript variant X1                                 |
| 289  | 211  | 0.73 | ARRDC1-AS1    | ARRDC1 antisense RNA 1, transcript variant 2                                                  |
| 252  | 184  | 0.73 | INA           | interneuron neuronal intermediate filament protein alpha                                      |
| 152  | 111  | 0.73 | ANKRD13B      | ankyrin repeat domain 13B, transcript variant X9                                              |
| 393  | 287  | 0.73 | TBC1D8B       | TBC1 domain family member 8B, transcript variant 2                                            |
| 3111 | 2272 | 0.73 | DBN1          | drebrin 1, transcript variant X4                                                              |
| 204  | 149  | 0.73 | PPBP          | pro-platelet basic protein                                                                    |
| 204  | 149  | 0.73 | WDR27         | WD repeat domain 27, transcript variant 5                                                     |
| 245  | 179  | 0.73 | FBXL4         | F-box and leucine rich repeat protein 4, transcript variant X4                                |
| 479  | 350  | 0.73 | ZNF252P       | zinc finger protein 252, pseudogene                                                           |
| 286  | 209  | 0.73 | RAP2A         | RAP2A, member of RAS oncogene family                                                          |
| 1003 | 733  | 0.73 | LONRF2        | LON peptidase N-terminal domain and ring finger 2                                             |
| 1549 | 1133 | 0.73 | UBXN7         | UBX domain protein 7                                                                          |
| 149  | 109  | 0.73 | ATP8A1        | ATPase phospholipid transporting 8A1, transcript variant X9                                   |
| 317  | 232  | 0.73 | PRSS23        | serine protease 23, transcript variant 4                                                      |
| 392  | 287  | 0.73 | LRR37BP1      |                                                                                               |
| 336  | 246  | 0.73 | ZFYVE26       | zinc finger FYVE-type containing 26, transcript variant X6                                    |
| 2360 | 1728 | 0.73 | PIKFYVE       | phosphoinositide kinase, FYVE-type zinc finger containing, transcript variant X20             |
| 127  | 93   | 0.73 | FBP1          | fructose-bisphosphatase 1, transcript variant X1                                              |
| 269  | 197  | 0.73 | DDX28         | DEAD-box helicase 28                                                                          |
| 273  | 200  | 0.73 | FIGNL1        | figetin like 1, transcript variant X1                                                         |
| 146  | 107  | 0.73 | NUDT15        | nudix hydrolase 15, transcript variant 2                                                      |
| 161  | 118  | 0.73 | KALRN         | kalirin RhoGEF kinase, transcript variant 4                                                   |
| 206  | 151  | 0.73 | RASAL3        | RAS protein activator like 3, transcript variant 3                                            |
| 135  | 99   | 0.73 | ALKBH8        | alkB homolog 8, tRNA methyltransferase, transcript variant X6                                 |
| 199  | 146  | 0.73 | TFPI          | tissue factor pathway inhibitor, transcript variant 1                                         |
| 383  | 281  | 0.73 | EXO1          | exonuclease 1, transcript variant X3                                                          |

|      |      |      |            |                                                                                         |
|------|------|------|------------|-----------------------------------------------------------------------------------------|
| 977  | 717  | 0.73 | PAK1       | p21 (RAC1) activated kinase 1, transcript variant X16                                   |
| 425  | 312  | 0.73 | LIN54      | lin-54 DREAM MuvB core complex component, transcript variant 7                          |
| 331  | 243  | 0.73 | NRDE2      | NRDE-2, necessary for RNA interference, domain containing, transcript variant X3        |
| 271  | 199  | 0.73 | ASB16-AS1  | ASB16 antisense RNA 1, transcript variant 1                                             |
| 347  | 255  | 0.73 | LOC93622   | Morf4 family associated protein 1 like 1 pseudogene, transcript variant 2               |
| 215  | 158  | 0.73 | MIR3605    | microRNA 3605                                                                           |
| 166  | 122  | 0.73 | C20orf96   | chromosome 20 open reading frame 96, transcript variant 2                               |
| 1000 | 735  | 0.74 | PTPN14     | protein tyrosine phosphatase non-receptor type 14                                       |
| 1517 | 1115 | 0.74 | CAPRN2     | caprin family member 2, transcript variant 4                                            |
| 151  | 111  | 0.74 | MDK        | midkine, transcript variant 5                                                           |
| 185  | 136  | 0.74 | GSPT2      | G1 to S phase transition 2                                                              |
| 997  | 733  | 0.74 | ARID1B     | AT-rich interaction domain 1B, transcript variant X9                                    |
| 461  | 339  | 0.74 | XKRX       | XK related X-linked                                                                     |
| 155  | 114  | 0.74 | FUT10      | fucosyltransferase 10, transcript variant X3                                            |
| 1226 | 902  | 0.74 | HEG1       | heart development protein with EGF like domains 1                                       |
| 182  | 134  | 0.74 | CROCC      | ciliary rootlet coiled-coil, rootletin, transcript variant X6                           |
| 167  | 123  | 0.74 | SCX        | scleraxis bHLH transcription factor, transcript variant X1                              |
| 186  | 137  | 0.74 | LINC00702  | long intergenic non-protein coding RNA 702                                              |
| 547  | 403  | 0.74 | GMCL1      | germ cell-less 1, spermatogenesis associated, transcript variant X4                     |
| 399  | 294  | 0.74 | DCHS1      | dachsous cadherin-related 1                                                             |
| 266  | 196  | 0.74 | CYB5RL     | cytochrome b5 reductase like, transcript variant 2                                      |
| 464  | 342  | 0.74 | SUSD3      | sushi domain containing 3, transcript variant X4                                        |
| 175  | 129  | 0.74 | FCF1P2     | FCF1 pseudogene 2                                                                       |
| 141  | 104  | 0.74 | MTFR2      | mitochondrial fission regulator 2, transcript variant X2                                |
| 324  | 239  | 0.74 | ADAP2      | ArfGAP with dual PH domains 2, transcript variant 4                                     |
| 267  | 197  | 0.74 | DUSP18     | dual specificity phosphatase 18, transcript variant 4                                   |
| 153  | 113  | 0.74 | LOC729603  | calcineurin like EF-hand protein 1 pseudogene                                           |
| 394  | 291  | 0.74 | MCM10      | minichromosome maintenance 10 replication initiation factor, transcript variant 1       |
| 482  | 356  | 0.74 | PTPRF      | protein tyrosine phosphatase receptor type F, transcript variant X15                    |
| 593  | 438  | 0.74 | RNF135     | ring finger protein 135, transcript variant X5                                          |
| 597  | 441  | 0.74 | TTC39C     | tetratricopeptide repeat domain 39C, transcript variant 4                               |
| 735  | 543  | 0.74 | SYNE3      | spectrin repeat containing nuclear envelope family member 3, transcript variant 2       |
| 349  | 258  | 0.74 | OXSRL1     | oxidative stress responsive kinase 1, transcript variant X4                             |
| 6857 | 5070 | 0.74 | RASAL2     | RAS protein activator like 2, transcript variant X5                                     |
| 284  | 210  | 0.74 | TMEM135    | transmembrane protein 135, transcript variant X1                                        |
| 611  | 452  | 0.74 | PPFIA4     | PTPRF interacting protein alpha 4, transcript variant X5                                |
| 1330 | 984  | 0.74 | RUBCNL     | rubicon like autophagy enhancer, transcript variant 6                                   |
| 846  | 626  | 0.74 | PAQR4      | progesterin and adipoQ receptor family member 4, transcript variant 3                   |
| 177  | 131  | 0.74 | TMEM243    | transmembrane protein 243, transcript variant 3                                         |
| 204  | 151  | 0.74 | TSPAN18    | tetraspanin 18, transcript variant X5                                                   |
| 2041 | 1511 | 0.74 | TRAC       |                                                                                         |
| 208  | 154  | 0.74 | CEP131     | centrosomal protein 131, transcript variant X2                                          |
| 1932 | 1431 | 0.74 | NMD3       | NMD3 ribosome export adaptor, transcript variant X3                                     |
| 162  | 120  | 0.74 | KIF3C      | kinesin family member 3C, transcript variant X1                                         |
| 340  | 252  | 0.74 | RPUSD3     | RNA pseudouridine synthase D3, transcript variant X2                                    |
| 286  | 212  | 0.74 | SHC2       | SHC adaptor protein 2, transcript variant X3                                            |
| 348  | 258  | 0.74 | EXOC6      | exocyst complex component 6, transcript variant 5                                       |
| 232  | 172  | 0.74 | CHD6       | chromodomain helicase DNA binding protein 6, transcript variant X6                      |
| 441  | 327  | 0.74 | LNPK       | lunapark, ER junction formation factor, transcript variant X5                           |
| 120  | 89   | 0.74 | LDLRAD3    | low density lipoprotein receptor class A domain containing 3, transcript variant 3      |
| 271  | 201  | 0.74 | APAF1      | apoptotic peptidase activating factor 1, transcript variant X1                          |
| 895  | 664  | 0.74 | LCOR       | ligand dependent nuclear receptor corepressor, transcript variant 4                     |
| 186  | 138  | 0.74 | MIR12127   | microRNA 12127                                                                          |
| 155  | 115  | 0.74 | SRGAP2D    | SLIT-ROBO Rho GTPase activating protein 2D (pseudogene)                                 |
| 124  | 92   | 0.74 | MLKL       | mixed lineage kinase domain like pseudokinase, transcript variant X9                    |
| 500  | 371  | 0.74 | CCDC88C    | coiled-coil domain containing 88C, transcript variant X3                                |
| 128  | 95   | 0.74 | C21orf58   | chromosome 21 open reading frame 58, transcript variant X6                              |
| 167  | 124  | 0.74 | C18orf54   | chromosome 18 open reading frame 54, transcript variant X5                              |
| 268  | 199  | 0.74 | ANKRD42    | ankyrin repeat domain 42, transcript variant 3                                          |
| 393  | 292  | 0.74 | MYCL       | MYCL proto-oncogene, bHLH transcription factor, transcript variant 2                    |
| 288  | 214  | 0.74 | FAM76B     | family with sequence similarity 76 member B, transcript variant X7                      |
| 401  | 298  | 0.74 | TRIM59     | tripartite motif containing 59                                                          |
| 152  | 113  | 0.74 | SPICE1     | spindle and centriole associated protein 1, transcript variant 3                        |
| 799  | 594  | 0.74 | FCHO2      | FCH domain only 2, transcript variant X5                                                |
| 1497 | 1113 | 0.74 | SPIN1      | spindlin 1                                                                              |
| 121  | 90   | 0.74 | KCNE3      | potassium voltage-gated channel subfamily E regulatory subunit 3, transcript variant X1 |
| 121  | 90   | 0.74 | PPCDC      | phosphopantothencycysteine decarboxylase, transcript variant X4                         |
| 613  | 456  | 0.74 | GFOD1      | glucose-fructose oxidoreductase domain containing 1, transcript variant 2               |
| 164  | 122  | 0.74 | GABPB1-IT1 | GABPB1 intronic transcript                                                              |
| 1605 | 1194 | 0.74 | CORO2B     | coronin 2B, transcript variant 1                                                        |
| 207  | 154  | 0.74 | PLEKHA8    | pleckstrin homology domain containing A8, transcript variant 1                          |
| 125  | 93   | 0.74 | SPATA5     | spermatogenesis associated 5, transcript variant 1                                      |
| 5002 | 3722 | 0.74 | DAB2       | DAB adaptor protein 2, transcript variant 2                                             |
| 512  | 381  | 0.74 | NAA40      | N(alpha)-acetyltransferase 40, NatD catalytic subunit, transcript variant 1             |
| 258  | 192  | 0.74 | GSTCD      | glutathione S-transferase C-terminal domain containing, transcript variant X3           |
| 692  | 515  | 0.74 | ZNF518A    | zinc finger protein 518A, transcript variant 4                                          |
| 180  | 134  | 0.74 | DNM3       | dynamin 3, transcript variant X4                                                        |
| 149  | 111  | 0.74 | MMS22L     | MMS22 like, DNA repair protein, transcript variant X10                                  |
| 149  | 111  | 0.74 | DOCK5      | dedicator of cytokinesis 5, transcript variant 2                                        |

|      |      |      |           |                                                                                                                      |
|------|------|------|-----------|----------------------------------------------------------------------------------------------------------------------|
| 200  | 149  | 0.75 | ADD3      | adducin 3, transcript variant X16                                                                                    |
| 463  | 345  | 0.75 | ZNF93     | zinc finger protein 93                                                                                               |
| 208  | 155  | 0.75 | LINC01605 | long intergenic non-protein coding RNA 1605, transcript variant 1                                                    |
| 471  | 351  | 0.75 | SNX18     | sorting nexin 18, transcript variant X2                                                                              |
| 157  | 117  | 0.75 | RBMS2     | RNA binding motif single stranded interacting protein 2, transcript variant X5                                       |
| 891  | 664  | 0.75 | SLA       | Src like adaptor, transcript variant 5                                                                               |
| 452  | 337  | 0.75 | COMMD8    | COMM domain containing 8, transcript variant X1                                                                      |
| 570  | 425  | 0.75 | CDC6      | cell division cycle 6, transcript variant X1                                                                         |
| 118  | 88   | 0.75 | CCDC9B    | coiled-coil domain containing 9B                                                                                     |
| 303  | 226  | 0.75 | ZNF445    | zinc finger protein 445, transcript variant X5                                                                       |
| 685  | 511  | 0.75 | CDYL2     | chromodomain Y like 2, transcript variant X1                                                                         |
| 1122 | 837  | 0.75 | SETDB2    | SET domain bifurcated histone lysine methyltransferase 2, transcript variant 1                                       |
| 516  | 385  | 0.75 | SRPK2     | SRSF protein kinase 2, transcript variant X7                                                                         |
| 130  | 97   | 0.75 | IFT88     | intraflagellar transport 88, transcript variant X15                                                                  |
| 457  | 341  | 0.75 | CLIP4     | CAP-Gly domain containing linker protein family member 4, transcript variant 4                                       |
| 800  | 597  | 0.75 | HTATSF1P2 | HIV-1 Tat specific factor 1 pseudogene 2                                                                             |
| 138  | 103  | 0.75 | DDX12P    | DEAD/H-box helicase 12, pseudogene                                                                                   |
| 761  | 568  | 0.75 | SLC11A1   | solute carrier family 11 member 1, transcript variant X9                                                             |
| 142  | 106  | 0.75 | ZFP28     | ZFP28 zinc finger protein, transcript variant X2                                                                     |
| 513  | 383  | 0.75 | FAM131B   | family with sequence similarity 131 member B, transcript variant X2                                                  |
| 616  | 460  | 0.75 | ATP10A    | ATPase phospholipid transporting 10A (putative), transcript variant X3                                               |
| 253  | 189  | 0.75 | ZNF451    | zinc finger protein 451, transcript variant X7                                                                       |
| 348  | 260  | 0.75 | CMTM7     | CKLF like MARVEL transmembrane domain containing 7, transcript variant X1                                            |
| 174  | 130  | 0.75 | LRRC28    | leucine rich repeat containing 28, transcript variant X3                                                             |
| 356  | 266  | 0.75 | HELLS     | helicase, lymphoid specific, transcript variant X2                                                                   |
| 178  | 133  | 0.75 | FANCC     | FA complementation group C, transcript variant 1                                                                     |
| 744  | 556  | 0.75 | MBD4      | methyl-CpG binding domain 4, DNA glycosylase, transcript variant 5                                                   |
| 9920 | 7414 | 0.75 | PCM1      | pericentriolar material 1, transcript variant 14                                                                     |
| 297  | 222  | 0.75 | TMEM86A   | transmembrane protein 86A                                                                                            |
| 800  | 598  | 0.75 | TEX2      | testis expressed 2, transcript variant X5                                                                            |
| 507  | 379  | 0.75 | EIF2AK2   | eukaryotic translation initiation factor 2 alpha kinase 2, transcript variant 3                                      |
| 824  | 616  | 0.75 | DOK2      | docking protein 2, transcript variant 3                                                                              |
| 947  | 708  | 0.75 | CRYBG3    | crystallin beta-gamma domain containing 3, transcript variant X1                                                     |
| 119  | 89   | 0.75 | TRIM3     | tripartite motif containing 3, transcript variant 5                                                                  |
| 365  | 273  | 0.75 | DDX52     | DExD-box helicase 52, transcript variant 1                                                                           |
| 520  | 389  | 0.75 | ELK3      | ETS transcription factor ELK3, transcript variant 2                                                                  |
| 163  | 122  | 0.75 | ILF3-DT   | ILF3 divergent transcript                                                                                            |
| 175  | 131  | 0.75 | ZNF786    | zinc finger protein 786                                                                                              |
| 195  | 146  | 0.75 | KCNJ1     | potassium voltage-gated channel subfamily J member 1, transcript variant 2                                           |
| 199  | 149  | 0.75 | DEPDC1    | DEP domain containing 1, transcript variant 1                                                                        |
| 402  | 301  | 0.75 | GUCY1A2   | guanylate cyclase 1 soluble subunit alpha 2, transcript variant 2                                                    |
| 1346 | 1008 | 0.75 | NSD1      | nuclear receptor binding SET domain protein 1, transcript variant X14                                                |
| 2955 | 2213 | 0.75 | NEAT1     | nuclear paraspeckle assembly transcript 1, transcript variant MENepsilon                                             |
| 327  | 245  | 0.75 | CD84      | CD84 molecule, transcript variant X1                                                                                 |
| 730  | 547  | 0.75 | NEDD9     | neural precursor cell expressed, developmentally down-regulated 9, transcript variant 4                              |
| 1301 | 975  | 0.75 | SLC7A8    | solute carrier family 7 member 8, transcript variant 5                                                               |
| 491  | 368  | 0.75 | RNF217    | ring finger protein 217, transcript variant X14                                                                      |
| 707  | 530  | 0.75 | MFAP3     | microfibril associated protein 3, transcript variant 2                                                               |
| 348  | 261  | 0.75 | GOLGA7B   | golgin A7 family member B                                                                                            |
| 224  | 168  | 0.75 | POC5      | POC5 centriolar protein, transcript variant X6                                                                       |
| 192  | 144  | 0.75 | TSPAN32   | tetraspanin 32, transcript variant X13                                                                               |
| 152  | 114  | 0.75 | KSRI      | kinase suppressor of ras 1, transcript variant 1                                                                     |
| 148  | 111  | 0.75 | PNPLA7    | patatin like phospholipase domain containing 7, transcript variant X4                                                |
| 140  | 105  | 0.75 | RTL5      | retrotransposon Gag like 5                                                                                           |
| 120  | 90   | 0.75 | TBC1D10C  | TBC1 domain family member 10C, transcript variant 2                                                                  |
| 2174 | 1631 | 0.75 | MDFIC     | MyoD family inhibitor domain containing, transcript variant 1                                                        |
| 453  | 340  | 0.75 | DBR1      | debranching RNA lariats 1                                                                                            |
| 321  | 241  | 0.75 | POLR3GL   | RNA polymerase III subunit G like, transcript variant 2                                                              |
| 253  | 190  | 0.75 | ZC3H3     | zinc finger CCCH-type containing 3, transcript variant X4                                                            |
| 241  | 181  | 0.75 | AFAP1L1   | actin filament associated protein 1 like 1, transcript variant 1                                                     |
| 928  | 697  | 0.75 | DENN4C    | DENN domain containing 4C, transcript variant X5                                                                     |
| 631  | 474  | 0.75 | SMARCAL1  | SWI/SNF related, matrix associated, actin dependent regulator of chromatin, subfamily a like 1, transcript variant 1 |
| 193  | 145  | 0.75 | CNTRL     | centriolin, transcript variant X14                                                                                   |
| 181  | 136  | 0.75 | C12orf76  | chromosome 12 open reading frame 76, transcript variant 3                                                            |
| 817  | 614  | 0.75 | CALHM2    | calcium homeostasis modulator family member 2, transcript variant 3                                                  |
| 314  | 236  | 0.75 | MGME1     | mitochondrial genome maintenance exonuclease 1, transcript variant 3                                                 |
| 306  | 230  | 0.75 | FOXP2     | forkhead box P2, transcript variant 7                                                                                |
| 141  | 106  | 0.75 | ZNF283    | zinc finger protein 283, transcript variant X8                                                                       |
| 270  | 203  | 0.75 | VWA8      | von Willebrand factor A domain containing 8, transcript variant 2                                                    |
| 133  | 100  | 0.75 | IFT74     | intraflagellar transport 74, transcript variant X3                                                                   |
| 496  | 373  | 0.75 | FAM214A   | family with sequence similarity 214 member A, transcript variant X2                                                  |
| 121  | 91   | 0.75 | SLC2A9    | solute carrier family 2 member 9, transcript variant X22                                                             |
| 121  | 91   | 0.75 | C9orf85   | chromosome 9 open reading frame 85, transcript variant 6                                                             |
| 549  | 413  | 0.75 | BBS10     | Bardet-Biedl syndrome 10                                                                                             |
| 432  | 325  | 0.75 | CARD6     | caspase recruitment domain family member 6, transcript variant X1                                                    |
| 828  | 623  | 0.75 | ITPKB     | inositol-trisphosphate 3-kinase B, transcript variant X2                                                             |
| 614  | 462  | 0.75 | CKAP2     | cytoskeleton associated protein 2, transcript variant 4                                                              |
| 194  | 146  | 0.75 | ARL11     | ADP ribosylation factor like GTPase 11                                                                               |

|       |       |      |           |                                                                                                  |
|-------|-------|------|-----------|--------------------------------------------------------------------------------------------------|
| 368   | 277   | 0.75 | SESTD1    | SEC14 and spectrin domain containing 1, transcript variant X6                                    |
| 364   | 274   | 0.75 | LARP4     | La ribonucleoprotein domain family member 4, transcript variant 30                               |
| 360   | 271   | 0.75 | ZNF407    | zinc finger protein 407, transcript variant 2                                                    |
| 449   | 338   | 0.75 | LINC00847 | long intergenic non-protein coding RNA 847, transcript variant 3                                 |
| 178   | 134   | 0.75 | PLD1      | phospholipase D1, transcript variant X7                                                          |
| 7173  | 5400  | 0.75 | SLC38A2   | solute carrier family 38 member 2, transcript variant 2                                          |
| 943   | 710   | 0.75 | TSPYL4    | TSPY like 4                                                                                      |
| 340   | 256   | 0.75 | RNASEH2A  | ribonuclease H2 subunit A                                                                        |
| 162   | 122   | 0.75 | RGPD8     | RANBP2 like and GRIP domain containing 8                                                         |
| 2573  | 1938  | 0.75 | MINDY2    | MINDY lysine 48 deubiquitinase 2, transcript variant X1                                          |
| 4751  | 3579  | 0.75 | FNDC3A    | fibronectin type III domain containing 3A, transcript variant X2                                 |
| 361   | 272   | 0.75 | TBCD      | tubulin folding cofactor D, transcript variant X28                                               |
| 771   | 581   | 0.75 | TMEM65    | transmembrane protein 65                                                                         |
| 345   | 260   | 0.75 | XRCC3     | X-ray repair cross complementing 3, transcript variant X1                                        |
| 207   | 156   | 0.75 | C17orf80  | chromosome 17 open reading frame 80, transcript variant 3                                        |
| 134   | 101   | 0.75 | TMLHE     | trimethyllysine hydroxylase, epsilon, transcript variant X2                                      |
| 256   | 193   | 0.75 | FKBP14    | FKBP prolyl isomerase 14, transcript variant 3                                                   |
| 126   | 95    | 0.75 | BMS1P4    | BMS1 pseudogene 4                                                                                |
| 736   | 555   | 0.75 | INPP4A    | inositol polyphosphate-4-phosphatase type I A, transcript variant c                              |
| 122   | 92    | 0.75 | SLC37A3   | solute carrier family 37 member 3, transcript variant 9                                          |
| 118   | 89    | 0.75 | HOXA11    | homeobox A11                                                                                     |
| 171   | 129   | 0.75 | C9orf139  | chromosome 9 open reading frame 139, transcript variant X3                                       |
| 2488  | 1877  | 0.75 | EVI2A     | ecotropic viral integration site 2A, transcript variant 2                                        |
| 167   | 126   | 0.75 | DST       | dystonin, transcript variant X33                                                                 |
| 994   | 750   | 0.75 | CLCN3     | chloride voltage-gated channel 3, transcript variant X1                                          |
| 359   | 271   | 0.75 | CDC47L    | cell division cycle associated 7 like, transcript variant 3                                      |
| 204   | 154   | 0.75 | HIST2H2BB | histone cluster 2 H2B family member b (pseudogene), transcript variant 2                         |
| 29060 | 21938 | 0.75 | SLC20A1   | solute carrier family 20 member 1                                                                |
| 253   | 191   | 0.75 | BEST1     | bestrophin 1, transcript variant 8                                                               |
| 1416  | 1069  | 0.75 | CREB3L2   | cAMP responsive element binding protein 3 like 2, transcript variant 1                           |
| 196   | 148   | 0.76 | ZNF506    | zinc finger protein 506, transcript variant 2                                                    |
| 486   | 367   | 0.76 | DPF3      | double PHD fingers 3, transcript variant 3                                                       |
| 813   | 614   | 0.76 | RANBP6    | RAN binding protein 6, transcript variant 2                                                      |
| 331   | 250   | 0.76 | HERC3     | HECT and RLD domain containing E3 ubiquitin protein ligase 3, transcript variant X9              |
| 2869  | 2167  | 0.76 | DCSTAMP   | dendrocyte expressed seven transmembrane protein, transcript variant 1                           |
| 188   | 142   | 0.76 | DTWD2     | DTW domain containing 2, transcript variant 1                                                    |
| 748   | 565   | 0.76 | TPST1     | tyrosylprotein sulfotransferase 1, transcript variant X6                                         |
| 278   | 210   | 0.76 | CEP57L1   | centrosomal protein 57 like 1, transcript variant X11                                            |
| 184   | 139   | 0.76 | SEPTIN3   | septin 3, transcript variant C                                                                   |
| 413   | 312   | 0.76 | SSX2IP    | SSX family member 2 interacting protein, transcript variant X3                                   |
| 229   | 173   | 0.76 | PANK2     | pantothenate kinase 2, transcript variant X5                                                     |
| 495   | 374   | 0.76 | NSL1      | NSL1 component of MIS12 kinetochore complex, transcript variant 1                                |
| 180   | 136   | 0.76 | DNMBP     | dynamitin binding protein, transcript variant 2                                                  |
| 352   | 266   | 0.76 | SKP2      | S-phase kinase associated protein 2, transcript variant 3                                        |
| 602   | 455   | 0.76 | PXK       | PX domain containing serine/threonine kinase like, transcript variant X3                         |
| 258   | 195   | 0.76 | PCDH7     | protocadherin 7, transcript variant X6                                                           |
| 504   | 381   | 0.76 | SPAST     | spastin, transcript variant X4                                                                   |
| 541   | 409   | 0.76 | MITF      | melanocyte inducing transcription factor, transcript variant 12                                  |
| 697   | 527   | 0.76 | ERCC4     | ERCC excision repair 4, endonuclease catalytic subunit, transcript variant X3                    |
| 328   | 248   | 0.76 | RBL1      | RB transcriptional corepressor like 1, transcript variant 2                                      |
| 123   | 93    | 0.76 | PIGZ      | phosphatidylinositol glycan anchor biosynthesis class Z, transcript variant X4                   |
| 123   | 93    | 0.76 | C19orf47  | chromosome 19 open reading frame 47, transcript variant X5                                       |
| 324   | 245   | 0.76 | HJURP     | Holliday junction recognition protein, transcript variant 3                                      |
| 320   | 242   | 0.76 | ACTR6     | actin related protein 6, transcript variant 1                                                    |
| 390   | 295   | 0.76 | RSPH3     | radial spoke head 3, transcript variant X2                                                       |
| 156   | 118   | 0.76 | SLF1      | SMC5-SMC6 complex localization factor 1, transcript variant X1                                   |
| 193   | 146   | 0.76 | UPRT      | uracil phosphoribosyltransferase homolog, transcript variant 4                                   |
| 230   | 174   | 0.76 | CKAP2L    | cytoskeleton associated protein 2 like, transcript variant 2                                     |
| 296   | 224   | 0.76 | ARHGAP32  | Rho GTPase activating protein 32, transcript variant X5                                          |
| 185   | 140   | 0.76 | ZNF701    | zinc finger protein 701, transcript variant X3                                                   |
| 1530  | 1158  | 0.76 | ITGA4     | integrin subunit alpha 4, transcript variant 1                                                   |
| 1016  | 769   | 0.76 | ANKRD44   | ankyrin repeat domain 44, transcript variant X6                                                  |
| 214   | 162   | 0.76 | KIAA1211  | KIAA1211, transcript variant X8                                                                  |
| 284   | 215   | 0.76 | ZFYVE9    | zinc finger FYVE-type containing 9, transcript variant X1                                        |
| 383   | 290   | 0.76 | MOSPD2    | motile sperm domain containing 2, transcript variant 3                                           |
| 622   | 471   | 0.76 | CCDC107   | coiled-coil domain containing 107, transcript variant B                                          |
| 301   | 228   | 0.76 | ENO2      | enolase 2                                                                                        |
| 330   | 250   | 0.76 | MCEMP1    | mast cell expressed membrane protein 1                                                           |
| 132   | 100   | 0.76 | BTB       | biotinidase, transcript variant 4                                                                |
| 6316  | 4786  | 0.76 | MICAL2    | microtubule associated monooxygenase, calponin and LIM domain containing 2, transcript variant 5 |
| 256   | 194   | 0.76 | CEP250    | centrosomal protein 250, transcript variant X15                                                  |
| 223   | 169   | 0.76 | PUS10     | pseudouridine synthase 10, transcript variant X10                                                |
| 979   | 742   | 0.76 | FAM168A   | family with sequence similarity 168 member A, transcript variant 2                               |
| 157   | 119   | 0.76 | SLC49A3   | solute carrier family 49 member 3, transcript variant X5                                         |
| 719   | 545   | 0.76 | STAC2     | SH3 and cysteine rich domain 2, transcript variant 2                                             |
| 781   | 592   | 0.76 | ABC9      | ATP binding cassette subfamily B member 9, transcript variant X12                                |
| 186   | 141   | 0.76 | DCLRE1C   | DNA cross-link repair 1C, transcript variant X1                                                  |
| 124   | 94    | 0.76 | C17orf75  | chromosome 17 open reading frame 75                                                              |
| 211   | 160   | 0.76 | YPEL3     | yippee like 3, transcript variant X1                                                             |



|      |      |      |              |                                                                                            |
|------|------|------|--------------|--------------------------------------------------------------------------------------------|
| 811  | 615  | 0.76 | ADCK2        | aarF domain containing kinase 2, transcript variant X1                                     |
| 149  | 113  | 0.76 | HEMK1        | HemK methyltransferase family member 1, transcript variant X10                             |
| 149  | 113  | 0.76 | PANK1        | pantothenate kinase 1, transcript variant alpha                                            |
| 149  | 113  | 0.76 | BRIP1        | BRCA1 interacting protein C-terminal helicase 1, transcript variant X9                     |
| 265  | 201  | 0.76 | METTL6       | methyltransferase like 6, transcript variant 2                                             |
| 2278 | 1728 | 0.76 | WIPF1        | WAS/WASL interacting protein family member 1, transcript variant 2                         |
| 5054 | 3834 | 0.76 | GLUL         | glutamate-ammonia ligase, transcript variant X1                                            |
| 174  | 132  | 0.76 | D2HGDH       | D-2-hydroxyglutarate dehydrogenase, transcript variant X20                                 |
| 116  | 88   | 0.76 | ENTPD5       | ectonucleoside triphosphate diphosphohydrolase 5 (inactive), transcript variant X9         |
| 2250 | 1707 | 0.76 | DOK3         | docking protein 3, transcript variant X3                                                   |
| 398  | 302  | 0.76 | LIN7A        | lin-7 homolog A, crumbs cell polarity complex component, transcript variant 3              |
| 1132 | 859  | 0.76 | SLC38A1      | solute carrier family 38 member 1, transcript variant X3                                   |
| 141  | 107  | 0.76 | TSPAN2       | tetraspanin 2, transcript variant 1                                                        |
| 419  | 318  | 0.76 | SAMD9L       | sterile alpha motif domain containing 9 like, transcript variant 5                         |
| 1025 | 778  | 0.76 | PDS5B        | PDS5 cohesin associated factor B, transcript variant X3                                    |
| 469  | 356  | 0.76 | ACAD8        | acyl-CoA dehydrogenase family member 8, transcript variant X8                              |
| 1071 | 813  | 0.76 | TBC1D13      | TBC1 domain family member 13, transcript variant 2                                         |
| 274  | 208  | 0.76 | PCCA         | propionyl-CoA carboxylase subunit alpha, transcript variant X12                            |
| 137  | 104  | 0.76 | MCM8         | minichromosome maintenance 8 homologous recombination repair factor, transcript variant X2 |
| 1545 | 1173 | 0.76 | SOX4         | SRY-box 4                                                                                  |
| 378  | 287  | 0.76 | LOC105375855 | uncharacterized LOC105375855                                                               |
| 162  | 123  | 0.76 | ARHGAP22     | Rho GTPase activating protein 22, transcript variant X18                                   |
| 403  | 306  | 0.76 | NTSR1        | neurotensin receptor 1, transcript variant X1                                              |
| 561  | 426  | 0.76 | POGLUT3      | protein O-glucosyltransferase 3, transcript variant 2                                      |
| 640  | 486  | 0.76 | KNTC1        | kinetochore associated 1, transcript variant X1                                            |
| 262  | 199  | 0.76 | STK39        | serine/threonine kinase 39, transcript variant X6                                          |
| 366  | 278  | 0.76 | PRMT9        | protein arginine methyltransferase 9, transcript variant 5                                 |
| 183  | 139  | 0.76 | RCAN3        | RCAN family member 3, transcript variant 9                                                 |
| 179  | 136  | 0.76 | LCORL        | ligand dependent nuclear receptor corepressor like, transcript variant X9                  |
| 204  | 155  | 0.76 | UBXN2A       | UBX domain protein 2A, transcript variant X7                                               |
| 350  | 266  | 0.76 | EGLN1        | egl-9 family hypoxia inducible factor 1, transcript variant X3                             |
| 275  | 209  | 0.76 | PARP9        | poly(ADP-ribose) polymerase family member 9, transcript variant 4                          |
| 150  | 114  | 0.76 | CCDC186      | coiled-coil domain containing 186, transcript variant X1                                   |
| 125  | 95   | 0.76 | SURF4        | surfeit 4, transcript variant 3                                                            |
| 371  | 282  | 0.76 | GINS3        | GINS complex subunit 3, transcript variant 3                                               |
| 542  | 412  | 0.76 | AMBRA1       | autophagy and beclin 1 regulator 1, transcript variant X7                                  |
| 171  | 130  | 0.76 | CD101        | CD101 molecule, transcript variant X1                                                      |
| 242  | 184  | 0.76 | CUEDC1       | CUE domain containing 1, transcript variant X4                                             |
| 121  | 92   | 0.76 | CXADR        | CXADR Ig-like cell adhesion molecule, transcript variant X3                                |
| 288  | 219  | 0.76 | OGG1         | 8-oxoguanine DNA glycosylase, transcript variant 1h                                        |
| 1244 | 946  | 0.76 | TUBA4A       | tubulin alpha 4a, transcript variant X1                                                    |
| 167  | 127  | 0.76 | TFDP2        | transcription factor Dp-2, transcript variant 3                                            |
| 213  | 162  | 0.76 | CEP120       | centrosomal protein 120, transcript variant 2                                              |
| 188  | 143  | 0.76 | FAM72A       | family with sequence similarity 72 member A, transcript variant X7                         |
| 188  | 143  | 0.76 | PCDHB5       | protocadherin beta 5                                                                       |
| 585  | 445  | 0.76 | TBC1D9       | TBC1 domain family member 9                                                                |
| 117  | 89   | 0.76 | ETV1         | ETS variant 1, transcript variant 8                                                        |
| 117  | 89   | 0.76 | DOCK9        | dedicator of cytokinesis 9, transcript variant 7                                           |
| 117  | 89   | 0.76 | RAB15        | RAB15, member RAS oncogene family, transcript variant X1                                   |
| 326  | 248  | 0.76 | ANKS6        | ankyrin repeat and sterile alpha motif domain containing 6                                 |
| 5072 | 3859 | 0.76 | GCLC         | glutamate-cysteine ligase catalytic subunit, transcript variant X1                         |
| 230  | 175  | 0.76 | ZNF808       | zinc finger protein 808, transcript variant 4                                              |
| 247  | 188  | 0.76 | RECK         | reversion inducing cysteine rich protein with kazal motifs, transcript variant X5          |
| 716  | 545  | 0.76 | DTNA         | dystrobrevin alpha, transcript variant X27                                                 |
| 486  | 370  | 0.76 | MGA          | MAX dimerization protein MGA, transcript variant X22                                       |
| 243  | 185  | 0.76 | FZD3         | frizzled class receptor 3, transcript variant X2                                           |
| 176  | 134  | 0.76 | PRSS36       | serine protease 36, transcript variant 3                                                   |
| 197  | 150  | 0.76 | SWT1         | SWT1 RNA endoribonuclease homolog, transcript variant X10                                  |
| 306  | 233  | 0.76 | FIGN         | fidgetin, microtubule severing factor, transcript variant 1                                |
| 1044 | 795  | 0.76 | MSH2         | mutS homolog 2, transcript variant 1                                                       |
| 478  | 364  | 0.76 | HMX3         | H6 family homeobox 3                                                                       |
| 239  | 182  | 0.76 | ING5         | inhibitor of growth family member 5, transcript variant X7                                 |
| 239  | 182  | 0.76 | ATAD5        | ATPase family AAA domain containing 5, transcript variant X1                               |
| 562  | 428  | 0.76 | CASP8        | caspase 8, transcript variant X11                                                          |
| 151  | 115  | 0.76 | ZMYM5        | zinc finger MYM-type containing 5, transcript variant 1                                    |
| 172  | 131  | 0.76 | METTL15      | methyltransferase like 15, transcript variant X3                                           |
| 600  | 457  | 0.76 | DENND1B      | DENN domain containing 1B, transcript variant X12                                          |
| 214  | 163  | 0.76 | TBC1D31      | TBC1 domain family member 31, transcript variant X5                                        |
| 210  | 160  | 0.76 | KCNIP2       | potassium voltage-gated channel interacting protein 2, transcript variant 6                |
| 189  | 144  | 0.76 | PHYH         | phytanoyl-CoA 2-hydroxylase, transcript variant 3                                          |
| 126  | 96   | 0.76 | C14orf93     | chromosome 14 open reading frame 93, transcript variant 5                                  |
| 584  | 445  | 0.76 | CAMK2B       | calcium/calmodulin dependent protein kinase II beta, transcript variant 1                  |
| 391  | 298  | 0.76 | ANKZF1       | ankyrin repeat and zinc finger peptidyl tRNA hydrolase 1, transcript variant 2             |
| 164  | 125  | 0.76 | SBF2         | SET binding factor 2, transcript variant X11                                               |
| 307  | 234  | 0.76 | DISP1        | dispatched RND transporter family member 1, transcript variant X6                          |
| 122  | 93   | 0.76 | TMEM144      | transmembrane protein 144, transcript variant X2                                           |
| 425  | 324  | 0.76 | ASB13        | ankyrin repeat and SOCS box containing 13, transcript variant 2                            |
| 1898 | 1447 | 0.76 | STK17B       | serine/threonine kinase 17b                                                                |
| 383  | 292  | 0.76 | PITPNM2      | phosphatidylinositol transfer protein membrane associated 2, transcript variant 1          |

|      |      |      |              |                                                                                    |
|------|------|------|--------------|------------------------------------------------------------------------------------|
| 964  | 735  | 0.76 | DGKD         | diacylglycerol kinase delta, transcript variant X14                                |
| 240  | 183  | 0.76 | FHL2         | four and a half LIM domains 2, transcript variant 9                                |
| 160  | 122  | 0.76 | PTPDC1       | protein tyrosine phosphatase domain containing 1, transcript variant X2            |
| 358  | 273  | 0.76 | BLM          | BLM RecQ like helicase, transcript variant 2                                       |
| 1887 | 1439 | 0.76 | MOB1B        | MOB kinase activator 1B, transcript variant X2                                     |
| 278  | 212  | 0.76 | FCHSD1       | FCH and double SH3 domains 1, transcript variant X10                               |
| 337  | 257  | 0.76 | JRK          | Jrk helix-turn-helix protein, transcript variant 2                                 |
| 594  | 453  | 0.76 | CHST13       | carbohydrate sulfotransferase 13                                                   |
| 375  | 286  | 0.76 | LINC00623    | long intergenic non-protein coding RNA 623, transcript variant 1                   |
| 413  | 315  | 0.76 | CDK20        | cyclin dependent kinase 20, transcript variant 5                                   |
| 236  | 180  | 0.76 | TPRG1        | tumor protein p63 regulated 1, transcript variant X15                              |
| 118  | 90   | 0.76 | UGT8         | UDP glycosyltransferase 8, transcript variant X3                                   |
| 215  | 164  | 0.76 | DIS3L        | DIS3 like exosome 3'-5' exoribonuclease, transcript variant 4                      |
| 253  | 193  | 0.76 | MAP3K12      | mitogen-activated protein kinase kinase kinase 12, transcript variant X1           |
| 291  | 222  | 0.76 | SLC25A13     | solute carrier family 25 member 13, transcript variant X7                          |
| 194  | 148  | 0.76 | PTCD2        | pentatricopeptide repeat domain 2, transcript variant X2                           |
| 1122 | 856  | 0.76 | BMP2K        | BMP2 inducible kinase, transcript variant 1                                        |
| 135  | 103  | 0.76 | SIGLEC9      | sialic acid binding Ig like lectin 9, transcript variant X1                        |
| 346  | 264  | 0.76 | PTPN13       | protein tyrosine phosphatase non-receptor type 13, transcript variant X6           |
| 173  | 132  | 0.76 | RRAGB        | Ras related GTP binding B, transcript variant X8                                   |
| 1249 | 953  | 0.76 | FGL2         | fibrinogen like 2                                                                  |
| 211  | 161  | 0.76 | LANCL3       | LanC like 3, transcript variant 1                                                  |
| 249  | 190  | 0.76 | KAZN         | kazrin, periplakin interacting protein, transcript variant G                       |
| 249  | 190  | 0.76 | B4GALNT1     | beta-1,4-N-acetyl-galactosaminyltransferase 1, transcript variant X2               |
| 266  | 203  | 0.76 | HAUS1        | HAUS augmin like complex subunit 1, transcript variant 2                           |
| 152  | 116  | 0.76 | PPP1R12B     | protein phosphatase 1 regulatory subunit 12B, transcript variant X4                |
| 152  | 116  | 0.76 | LMBR1L       | limb development membrane protein 1 like, transcript variant X3                    |
| 701  | 535  | 0.76 | PRDM10       | PR/SET domain 10, transcript variant 4                                             |
| 397  | 303  | 0.76 | MAP3K14      | mitogen-activated protein kinase kinase kinase 14, transcript variant X2           |
| 359  | 274  | 0.76 | DHTKD1       | dehydrogenase E1 and transketolase domain containing 1                             |
| 207  | 158  | 0.76 | ERI1         | exoribonuclease 1, transcript variant 3                                            |
| 1948 | 1487 | 0.76 | ST3GAL1      | ST3 beta-galactoside alpha-2,3-sialyltransferase 1, transcript variant X2          |
| 579  | 442  | 0.76 | MACO1        | macoillin 1, transcript variant X1                                                 |
| 279  | 213  | 0.76 | WDR19        | WD repeat domain 19, transcript variant X6                                         |
| 389  | 297  | 0.76 | TMEM39B      | transmembrane protein 39B, transcript variant X2                                   |
| 867  | 662  | 0.76 | ADCY1        | adenylate cyclase 1, transcript variant 1                                          |
| 990  | 756  | 0.76 | THEMIS2      | thymocyte selection associated family member 2, transcript variant X1              |
| 622  | 475  | 0.76 | PAQR5        | progesterin and adipoQ receptor family member 5, transcript variant X10            |
| 292  | 223  | 0.76 | GTPBP10      | GTP binding protein 10, transcript variant 1                                       |
| 292  | 223  | 0.76 | ST7          | suppression of tumorigenicity 7, transcript variant 10                             |
| 419  | 320  | 0.76 | PCDHGB4      | protocadherin gamma subfamily B, 4, transcript variant 2                           |
| 707  | 540  | 0.76 | RFX8         | RFX family member 8, lacking RFX DNA binding domain, transcript variant X1         |
| 398  | 304  | 0.76 | ACBD5        | acyl-CoA binding domain containing 5, transcript variant X11                       |
| 343  | 262  | 0.76 | VLDLR        | very low density lipoprotein receptor, transcript variant X2                       |
| 144  | 110  | 0.76 | SGO1         | shugoshin 1, transcript variant 14                                                 |
| 144  | 110  | 0.76 | ZNF528       | zinc finger protein 528, transcript variant X6                                     |
| 1059 | 809  | 0.76 | JADE1        | jade family PHD finger 1, transcript variant X4                                    |
| 305  | 233  | 0.76 | ZNF141       | zinc finger protein 141, transcript variant X1                                     |
| 466  | 356  | 0.76 | MRPL55       | mitochondrial ribosomal protein L55, transcript variant 3                          |
| 483  | 369  | 0.76 | CHRM3        | cholinergic receptor muscarinic 3, transcript variant X4                           |
| 161  | 123  | 0.76 | VSIG10       | V-set and immunoglobulin domain containing 10, transcript variant X6               |
| 500  | 382  | 0.76 | ZBTB7C       | zinc finger and BTB domain containing 7C, transcript variant X8                    |
| 1123 | 858  | 0.76 | DOK1         | docking protein 1, transcript variant X1                                           |
| 2950 | 2254 | 0.76 | VASH1        | vasohibin 1, transcript variant X6                                                 |
| 195  | 149  | 0.76 | SCAMP5       | secretory carrier membrane protein 5, transcript variant X2                        |
| 301  | 230  | 0.76 | HPS4         | HPS4 biogenesis of lysosomal organelles complex 3 subunit 2, transcript variant 13 |
| 441  | 337  | 0.76 | ZNF213       | zinc finger protein 213, transcript variant 2                                      |
| 458  | 350  | 0.76 | PEX6         | peroxisomal biogenesis factor 6, transcript variant X2                             |
| 721  | 551  | 0.76 | TK2          | thymidine kinase 2, transcript variant 7                                           |
| 123  | 94   | 0.76 | LOC105369828 | uncharacterized LOC105369828, transcript variant X2                                |
| 140  | 107  | 0.76 | PRIMPOL      | primase and DNA directed polymerase, transcript variant 7                          |
| 577  | 441  | 0.76 | ABCA1        | ATP binding cassette subfamily A member 1, transcript variant X12                  |
| 437  | 334  | 0.76 | AMDHD2       | amidohydrolase domain containing 2, transcript variant X1                          |
| 1184 | 905  | 0.76 | BMI1         | BMI1 proto-oncogene, polycomb ring finger                                          |
| 174  | 133  | 0.76 | TRIM38       | tripartite motif containing 38, transcript variant X6                              |
| 365  | 279  | 0.76 | MUTYH        | mutY DNA glycosylase, transcript variant X10                                       |
| 191  | 146  | 0.76 | NAA16        | N(alpha)-acetyltransferase 16, NatA auxiliary subunit, transcript variant X6       |
| 225  | 172  | 0.76 | CRLS1        | cardiolipin synthase 1, transcript variant 6                                       |
| 841  | 643  | 0.76 | TPX2         | TPX2 microtubule nucleation factor, transcript variant X3                          |
| 633  | 484  | 0.76 | KIAA1109     | KIAA1109, transcript variant X3                                                    |
| 684  | 523  | 0.76 | DAPK1        | death associated protein kinase 1, transcript variant 1                            |
| 527  | 403  | 0.76 | PAQR3        | progesterin and adipoQ receptor family member 3, transcript variant 6              |
| 476  | 364  | 0.76 | SLC36A1      | solute carrier family 36 member 1, transcript variant X23                          |
| 204  | 156  | 0.76 | FANCM        | FA complementation group M, transcript variant X6                                  |
| 170  | 130  | 0.76 | RAP1GAP      | RAP1 GTPase activating protein, transcript variant X23                             |
| 421  | 322  | 0.76 | ST3GAL6      | ST3 beta-galactoside alpha-2,3-sialyltransferase 6, transcript variant 18          |
| 1093 | 836  | 0.76 | IL4R         | interleukin 4 receptor, transcript variant X8                                      |
| 353  | 270  | 0.76 | LIN9         | lin-9 DREAM MuvB core complex component, transcript variant 6                      |
| 638  | 488  | 0.76 | MIS18BP1     | MIS18 binding protein 1, transcript variant X5                                     |

|     |     |      |        |                                                        |
|-----|-----|------|--------|--------------------------------------------------------|
| 302 | 231 | 0.76 | CDCA2  | cell division cycle associated 2, transcript variant 1 |
| 587 | 449 | 0.76 | IQSEC2 | IQ motif and Sec7 domain 2, transcript variant X13     |
| 251 | 192 | 0.76 | CHEK2  | checkpoint kinase 2, transcript variant X3             |
